# Supplementary material for: Experimental and theoretical study of tetraphenylethylene-based dicationic compounds for corrosion inhibition of steel and brass in an acidic medium
Source: Royal Society of Chemistry journal article supplement (doi:10.1039/d3nj00785e), 2023-01-01
Supplement: d3nj00785e1.pdf [file d3nj00785e1.pdf]

## Electronic Supplementary Information

### **Experimental and theoretical study of Tetraphenylethylene-based dicationic compounds for corrosion inhibition of steel and brass in acidic medium**

Yiming An<sup>†</sup>, Yumeng Chen<sup>†</sup>, Xue Lei, Song Gao, Mudi Xin, Fulin Qiao, Yue Zhao, Lushen Zuo, Fei Sun\*, Chunlu Wang\*

Sinopec Research Institute of Petroleum Processing Co., Ltd. Beijing 100083, P. R. China

\*Corresponding authors

E-mail addresses: sunfei.ripp@sinopec.com (Fei Sun)

wcl.ripp@sinopec.com (Chunlu Wang)

# Contents

|                                                                 |            |
|-----------------------------------------------------------------|------------|
| <b>1. Synthesis and characterization .....</b>                  | <b>S3</b>  |
| <b>2. UV-Vis absorption spectra .....</b>                       | <b>S11</b> |
| <b>3. AIE characteristic study .....</b>                        | <b>S13</b> |
| <b>4. Electrochemical measurements .....</b>                    | <b>S17</b> |
| <b>5. SEM images .....</b>                                      | <b>S26</b> |
| <b>6. XPS data .....</b>                                        | <b>S35</b> |
| <b>7. Corrosion inhibitors in literature .....</b>              | <b>S37</b> |
| <b>8. Grand Canonical Monte Carlo (GCMC) Calculations .....</b> | <b>S39</b> |

## 1. Synthesis and characterization

TPE-2NO<sub>2</sub> and TPE-2NH<sub>2</sub> were prepared according to literatures [S1-S5].

**Synthesis of TPE-2NH<sub>3</sub>·SO<sub>4</sub>:** In a 50 mL round-bottom flask, TPE-2NH<sub>2</sub> (724 mg, 2.0 mmol) was dissolved in mixed solvent of acetone (15 mL) and ethanol (15 mL). Then, concentrated sulfuric acid (220 mg, 2.2 mmol) was added slowly, with emergence of insoluble sediment immediately. The mixture was stirred for 30 min and filtered. The residue was washed with ethanol for more than three times. Then, it was collected and dried in vacuum, to afford TPE-2NH<sub>3</sub>·SO<sub>4</sub> as yellow solid (883 mg) in 96% yield. <sup>1</sup>H NMR (400 MHz, DMSO-d<sub>6</sub>): δ 7.17 – 7.08 (6 H, m), 7.05 – 6.83 (12 H, m); <sup>13</sup>C NMR (100 MHz, DMSO-d<sub>6</sub>): δ 146.96, 144.95, 141.78, 135.32, 131.81, 131.07, 130.84, 127.59, 125.43; HRMS (ESI, positive): calcd. for C<sub>26</sub>H<sub>23</sub>N<sub>2</sub> [M – H<sup>+</sup>] (m/z): 363.18558; found: 363.18566.

**Synthesis of TPE-2NH<sub>3</sub>·2SCN:** A suspension of TPE-2NH<sub>3</sub>·SO<sub>4</sub> (690 mg, 1.5 mmol) in ethanol (20 mL) was stirred in a 50 mL round-bottom flask. Then, an ethanol (5 mL) solution dissolved with NaSCN (243 mg, 3.0 mmol) was added, heated to 50 °C and stirred for 1 h. After being cooled to room temperature, the mixture was centrifuged and filtered. The organic phase was evaporated and dried in vacuum, to afford TPE-2NH<sub>3</sub>·2SCN as yellow solid (670 mg) in 93% yield. <sup>1</sup>H NMR (400 MHz, DMSO-d<sub>6</sub>): δ 7.20 – 7.11 (6 H, m), 7.10 – 7.03 (8 H, m), 7.01 – 6.95 (4 H, d); <sup>13</sup>C NMR (100 MHz, DMSO-d<sub>6</sub>): δ 142.76, 141.76, 138.45, 131.99, 131.55, 130.58, 129.78, 128.07, 126.88, 122.00; HRMS (ESI, positive): calcd. for C<sub>26</sub>H<sub>23</sub>N<sub>2</sub> [M – H<sup>+</sup>] (m/z): 363.18558; found: 363.18574. calcd. for C<sub>26</sub>H<sub>22</sub>N<sub>2</sub>Na [M – 2H<sup>+</sup> + Na<sup>+</sup>] (m/z): 385.16752; found: 385.16772.

**Synthesis of TPE-2NH<sub>3</sub>·2Cl:** In a 50 mL round-bottom flask, TPE-2NH<sub>2</sub> (363 mg, 1.0 mmol) was dissolved in mixed solvent of acetone (15 mL) and ethanol (15 mL). Then, concentrated hydrochloric acid (223 mg, 2.2 mmol) was added slowly, with emergence of insoluble sediment immediately. The mixture was stirred for 30 min and filtered. The residue was washed with acetone for more than three times. Then, it was collected and dried in vacuum, to afford TPE-2NH<sub>3</sub>·2Cl as yellow solid (413 mg) in 95% yield. <sup>1</sup>H NMR (400 MHz, DMSO-d<sub>6</sub>): δ 7.18 – 7.11 (6 H, m), 7.09 – 7.01 (8 H, m), 7.00 – 6.95 (4 H, d); <sup>13</sup>C NMR (100 MHz, DMSO-d<sub>6</sub>): δ 142.75, 141.09, 138.59, 131.73, 130.38, 127.80, 126.54, 120.96; HRMS (ESI, positive): calcd. for C<sub>26</sub>H<sub>23</sub>N<sub>2</sub> [M – H<sup>+</sup>] (m/z): 363.18558; found: 363.18576.

**Synthesis of TPE-2NH<sub>3</sub>·2Br:** In a 50 mL round-bottom flask, TPE-2NH<sub>2</sub> (363 mg, 1.0 mmol) was dissolved in mixed solvent of acetone (15 mL) and ethanol (15 mL). Then, 40% hydrobromic acid (445 mg, 2.2 mmol) was added slowly, with emergence of insoluble sediment immediately. The mixture was stirred for 30 min and filtered. The residue was washed with ethanol for more than three times. Then, it was collected and dried in vacuum, to afford TPE-2NH<sub>3</sub>·2Br as yellow solid (498 mg) in 95% yield. <sup>1</sup>H NMR (400 MHz, DMSO-d<sub>6</sub>): δ 7.20 – 7.11 (6 H, m), 7.10 – 7.03 (8 H, m), 7.01 – 6.95 (4 H, d); <sup>13</sup>C NMR (100 MHz, DMSO-d<sub>6</sub>): δ 142.71, 141.62, 138.43, 131.89, 130.50, 127.97, 126.77, 121.78; HRMS (ESI, positive): calcd. for C<sub>26</sub>H<sub>23</sub>N<sub>2</sub> [M – H<sup>+</sup>] (m/z): 363.18558; found: 363.18558.

**Synthesis of TPE-2NH<sub>3</sub>·2NO<sub>3</sub>:** In a 50 mL round-bottom flask, TPE-2NH<sub>2</sub> (363 mg, 1.0 mmol) was dissolved in mixed solvent of acetone (15 mL) and ethanol (15 mL). Then, concentrated nitric acid (214 mg, 2.2 mmol) was added slowly, with emergence of insoluble sediment immediately. The mixture was stirred for 30 min and filtered. The residue was washed with ethanol for more than three times. Then, it was collected and dried in vacuum, to afford TPE-2NH<sub>3</sub>·2NO<sub>3</sub> as brown solid (460 mg) in 94% yield. <sup>1</sup>H NMR (400 MHz, DMSO-d<sub>6</sub>): δ 7.20 – 7.10 (6 H, m), 7.05 – 6.98 (8 H, m), 6.98 – 6.94 (4 H, d); <sup>13</sup>C NMR (100 MHz, DMSO-d<sub>6</sub>): δ 142.84, 141.31, 138.60, 131.90, 130.52, 127.96, 126.71, 121.28; HRMS (ESI, positive): calcd. for C<sub>26</sub>H<sub>23</sub>N<sub>2</sub> [M – H<sup>+</sup>] (m/z): 363.18558; found: 363.18536.

**Synthesis of TPE-2NH<sub>3</sub>·2NH<sub>2</sub>SO<sub>3</sub>:** In a 50 mL round-bottom flask, TPE-2NH<sub>2</sub> (363 mg, 1.0 mmol) was dissolved in mixed solvent of acetone (15 mL) and ethanol (15 mL). Then, sulfamic acid (214 mg, 2.2 mmol) was added slowly, with emergence of insoluble sediment immediately. The mixture was stirred for 30 min and filtered. The residue was washed with ethanol for more than three times. Then, it was collected and dried in vacuum, to afford TPE-2NH<sub>3</sub>·2NH<sub>2</sub>SO<sub>3</sub> as yellow solid (512 mg) in 92% yield. <sup>1</sup>H NMR (400 MHz, DMSO-d<sub>6</sub>): δ 7.20 – 7.14 (4 H, m), 7.14 – 7.08 (3 H, m), 7.03 – 6.93 (11 H, m); <sup>13</sup>C NMR (100 MHz, DMSO-d<sub>6</sub>): δ 146.31, 144.87, 141.65, 135.61, 131.83, 131.57, 130.85, 127.64, 125.52; HRMS (ESI, positive): calcd. for C<sub>26</sub>H<sub>23</sub>N<sub>2</sub> [M – H<sup>+</sup>] (m/z): 363.18558; found: 363.18548.

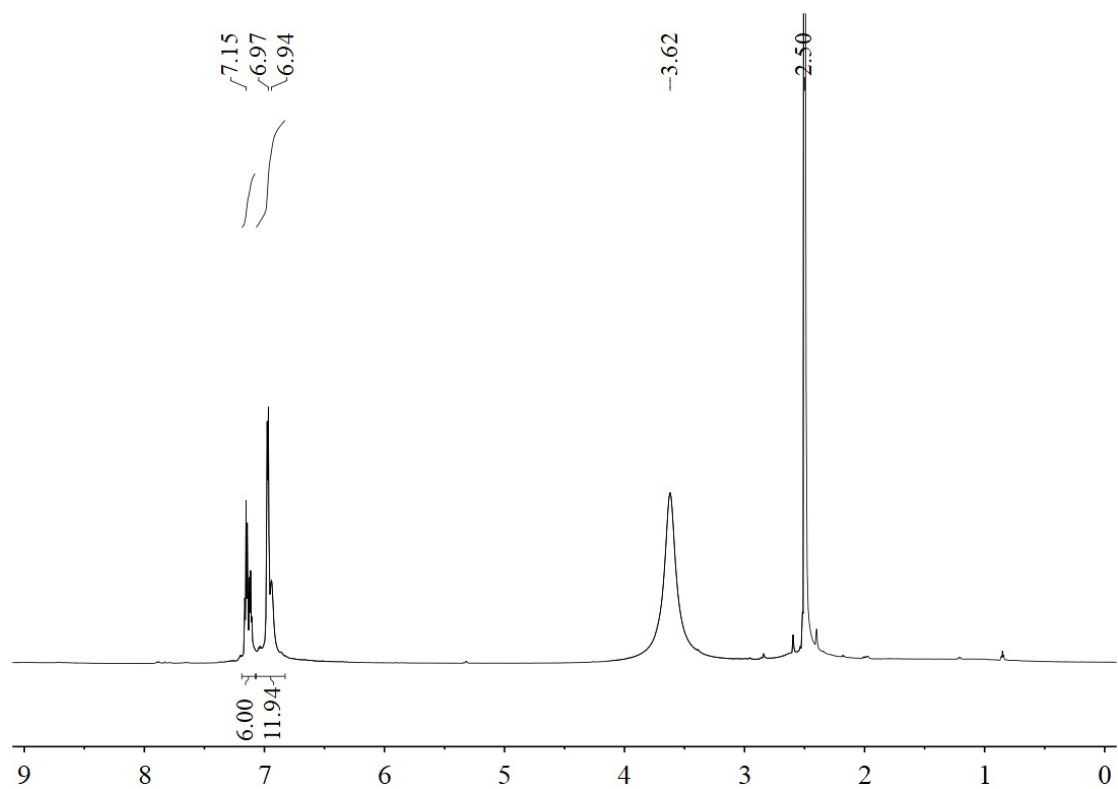

**Fig. S1**  $^1\text{H}$  NMR spectrum of  $\text{TPE}\cdot 2\text{NH}_3\cdot \text{SO}_4$ .

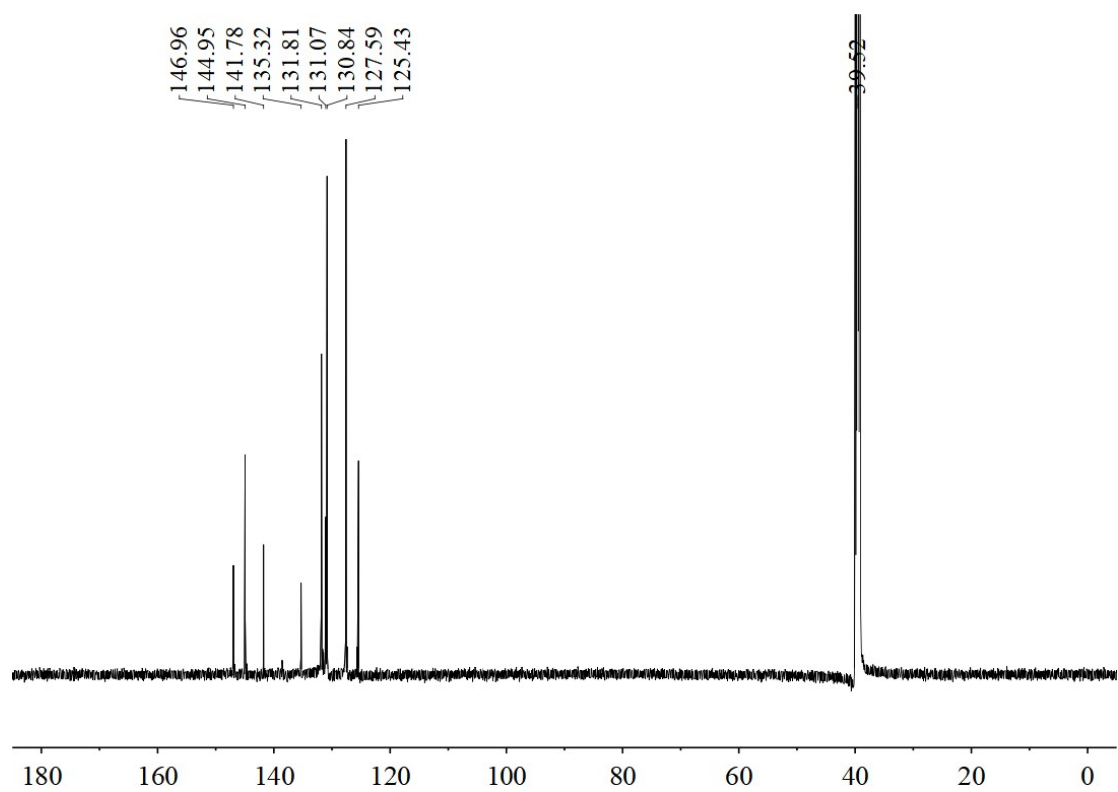

**Fig. S2**  $^{13}\text{C}$  NMR spectrum of  $\text{TPE}\cdot 2\text{NH}_3\cdot \text{SO}_4$ .

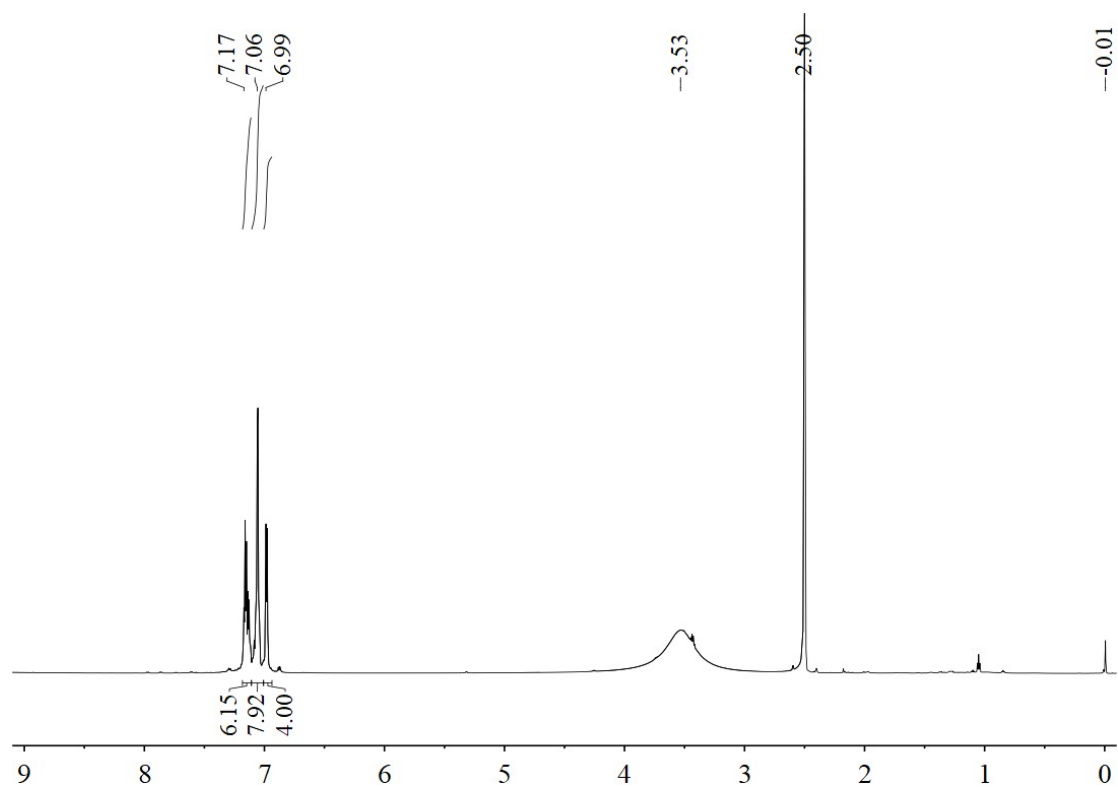

**Fig. S3**  $^1\text{H}$  NMR spectrum of TPE-2NH<sub>3</sub>·2SCN.

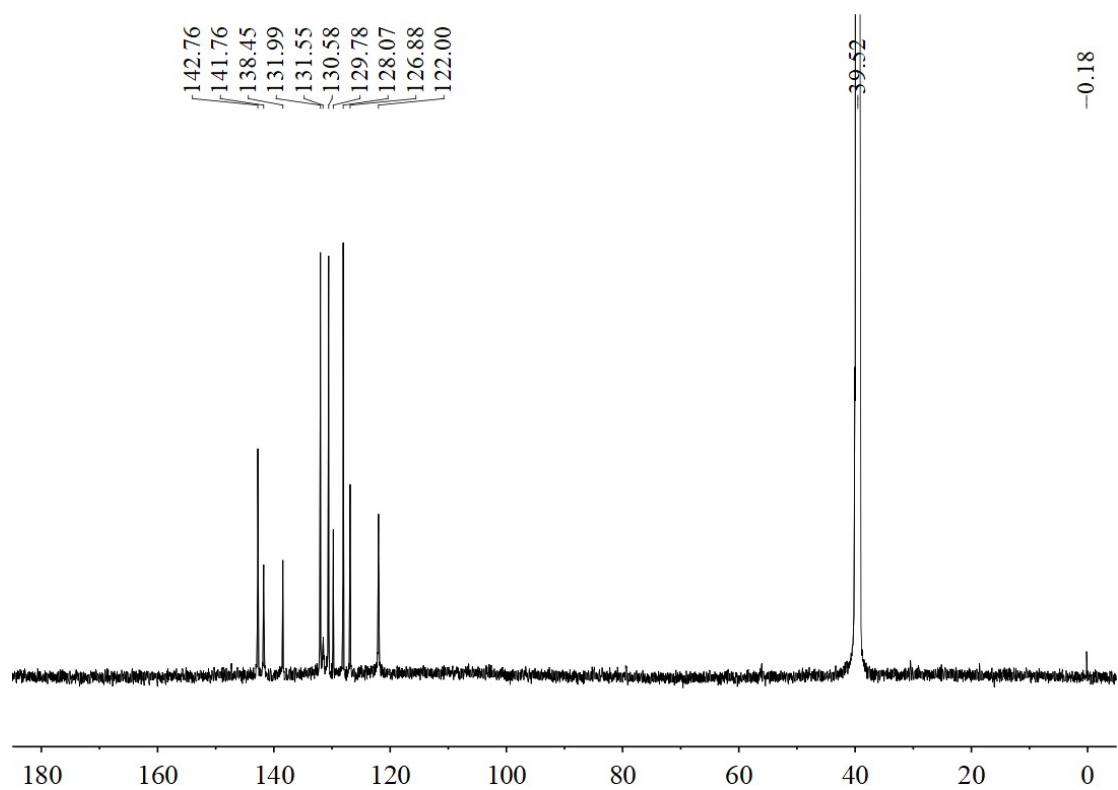

**Fig. S4**  $^{13}\text{C}$  NMR spectrum of TPE-2NH<sub>3</sub>·2SCN.

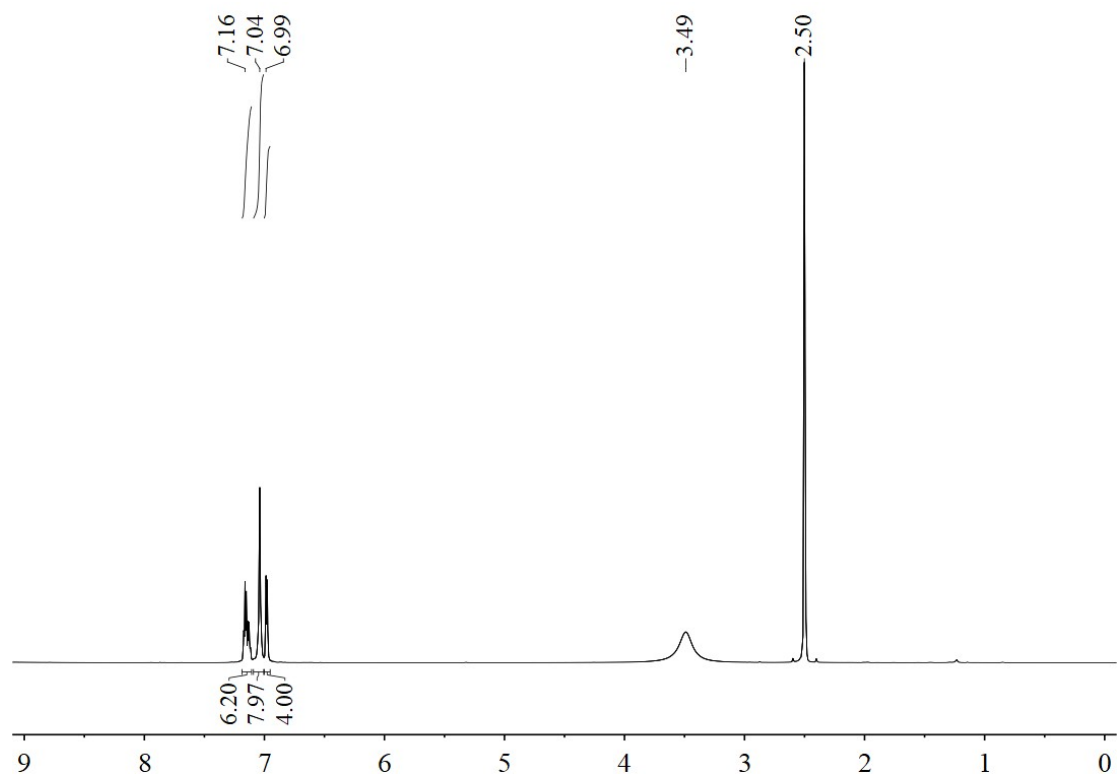

**Fig. S5**  $^1\text{H}$  NMR spectrum of TPE- $2\text{NH}_3 \cdot 2\text{Cl}$ .

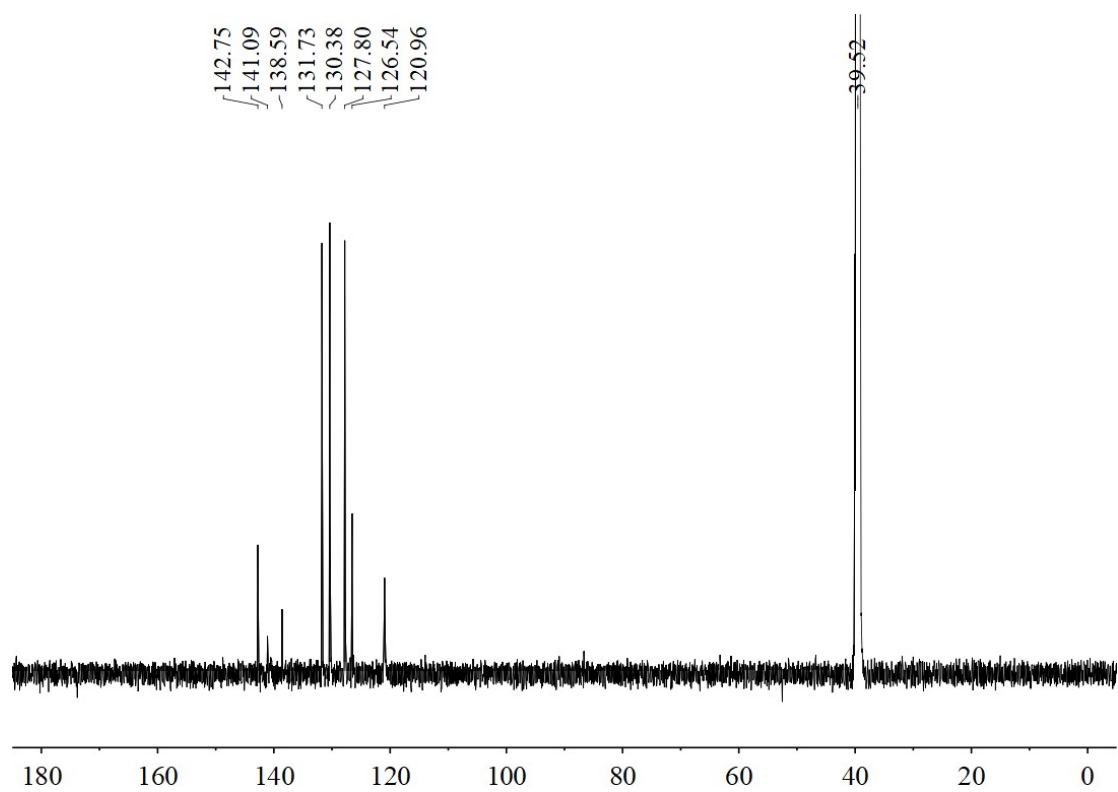

**Fig. S6**  $^{13}\text{C}$  NMR spectrum of TPE- $2\text{NH}_3 \cdot 2\text{Cl}$ .

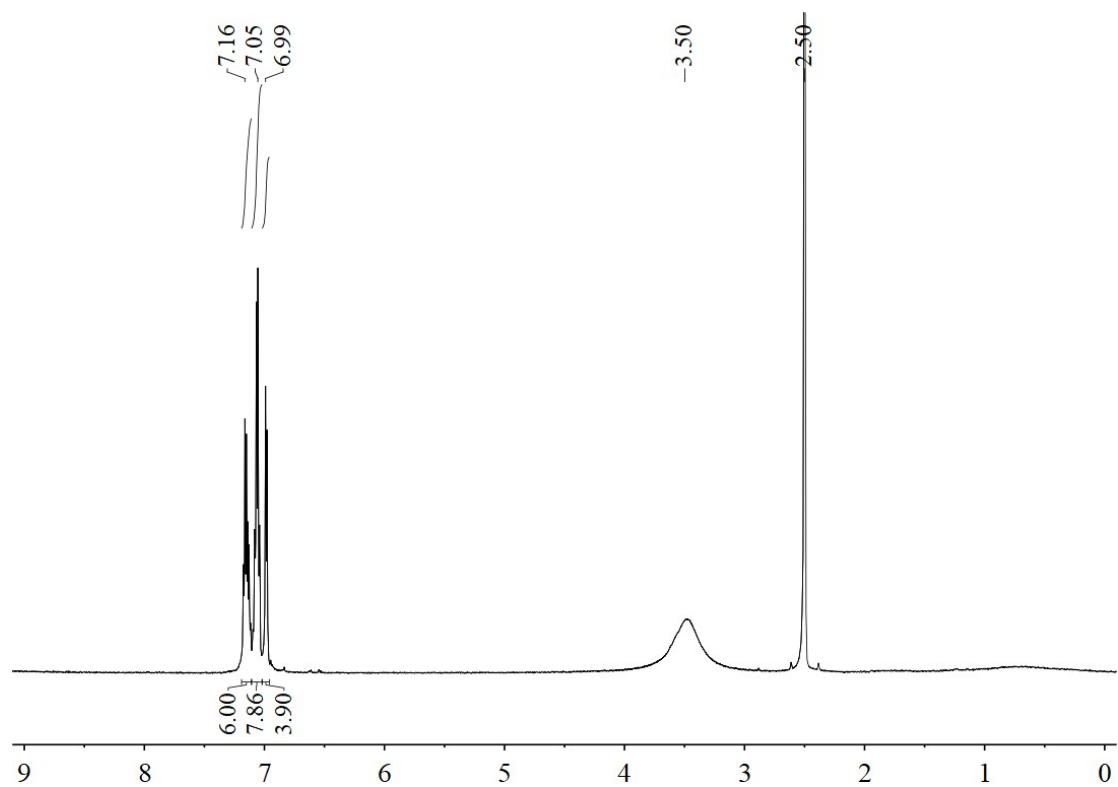

**Fig. S7**  $^1\text{H}$  NMR spectrum of TPE- $2\text{NH}_3 \cdot 2\text{Br}$ .

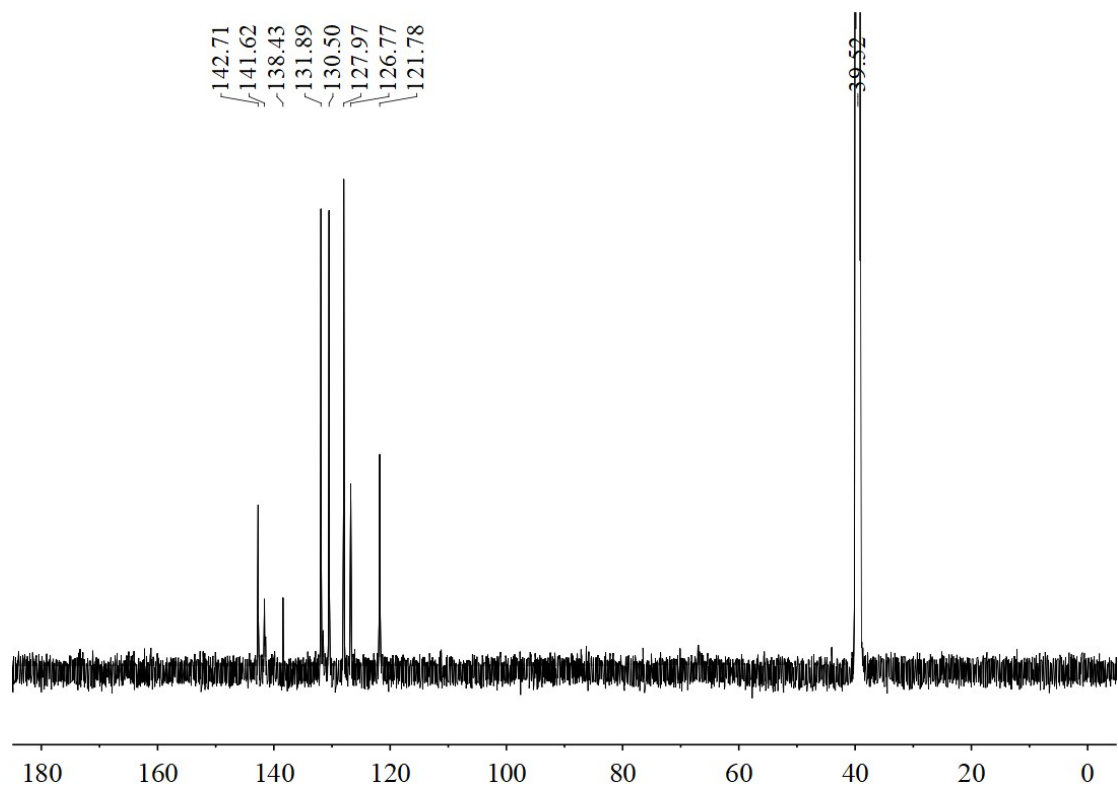

**Fig. S8**  $^{13}\text{C}$  NMR spectrum of TPE- $2\text{NH}_3 \cdot 2\text{Br}$ .



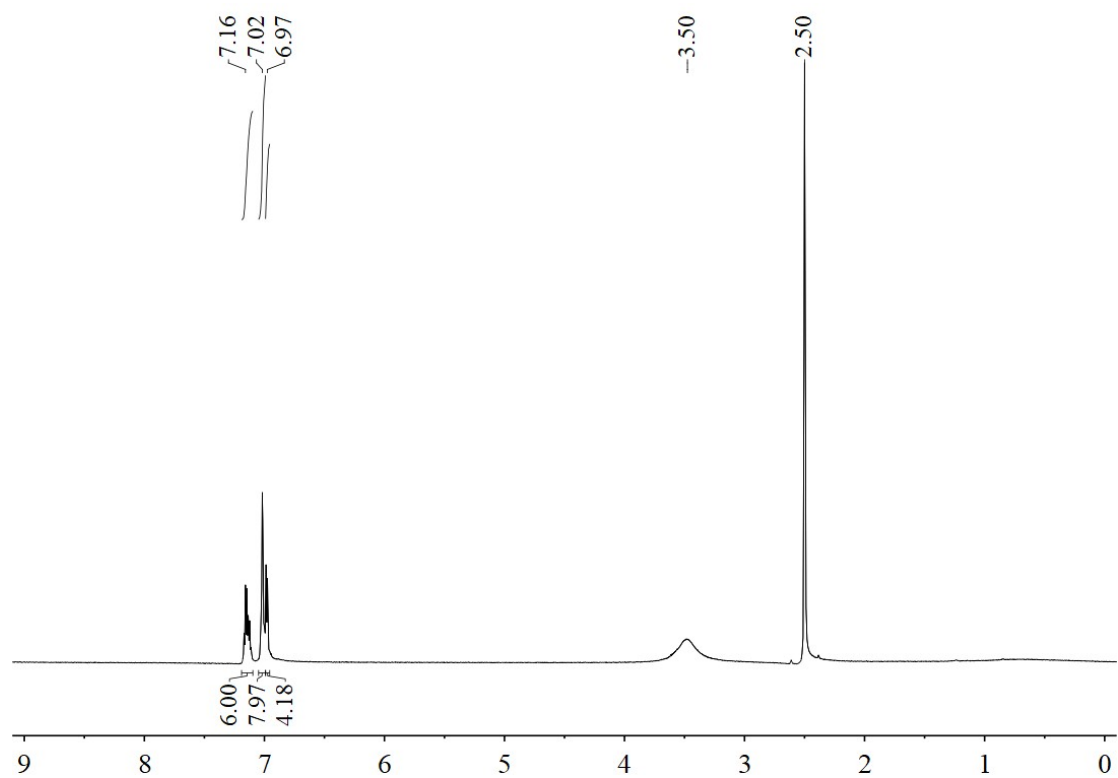

**Fig. S9**  $^1\text{H}$  NMR spectrum of  $\text{TPE}\cdot 2\text{NH}_3\cdot 2\text{NO}_3$ .

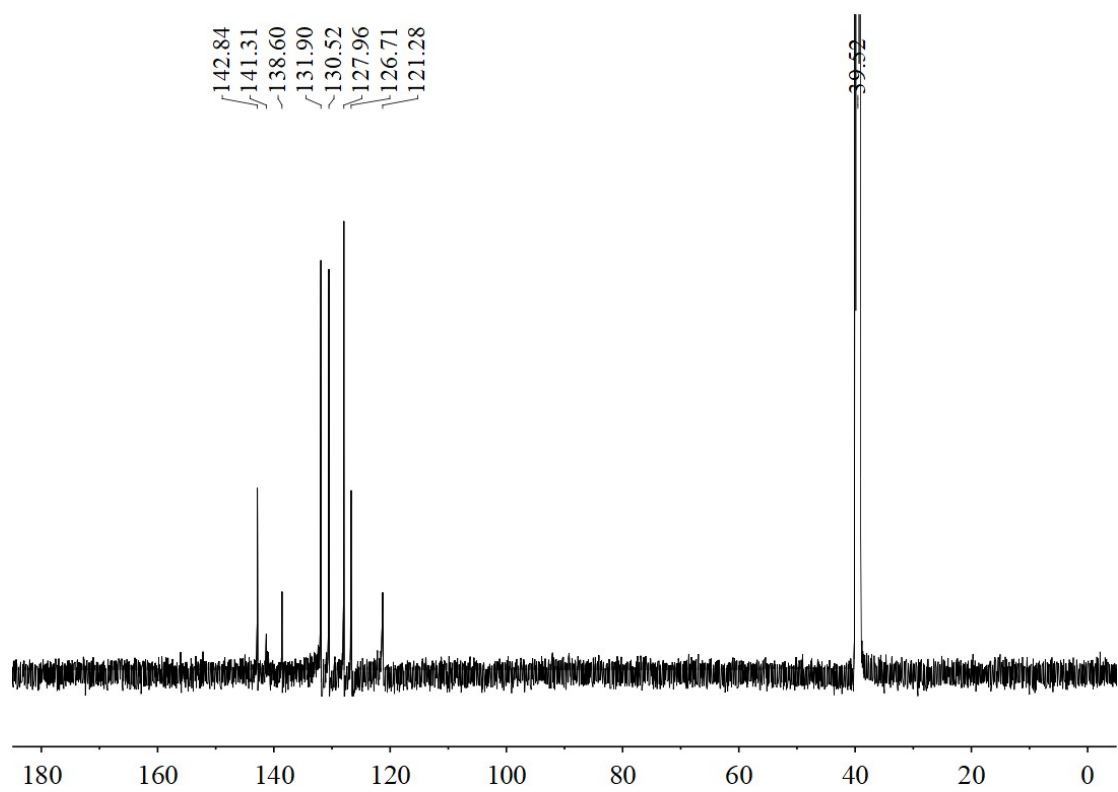

**Fig. S10**  $^{13}\text{C}$  NMR spectrum of  $\text{TPE}\cdot 2\text{NH}_3\cdot 2\text{NO}_3$ .

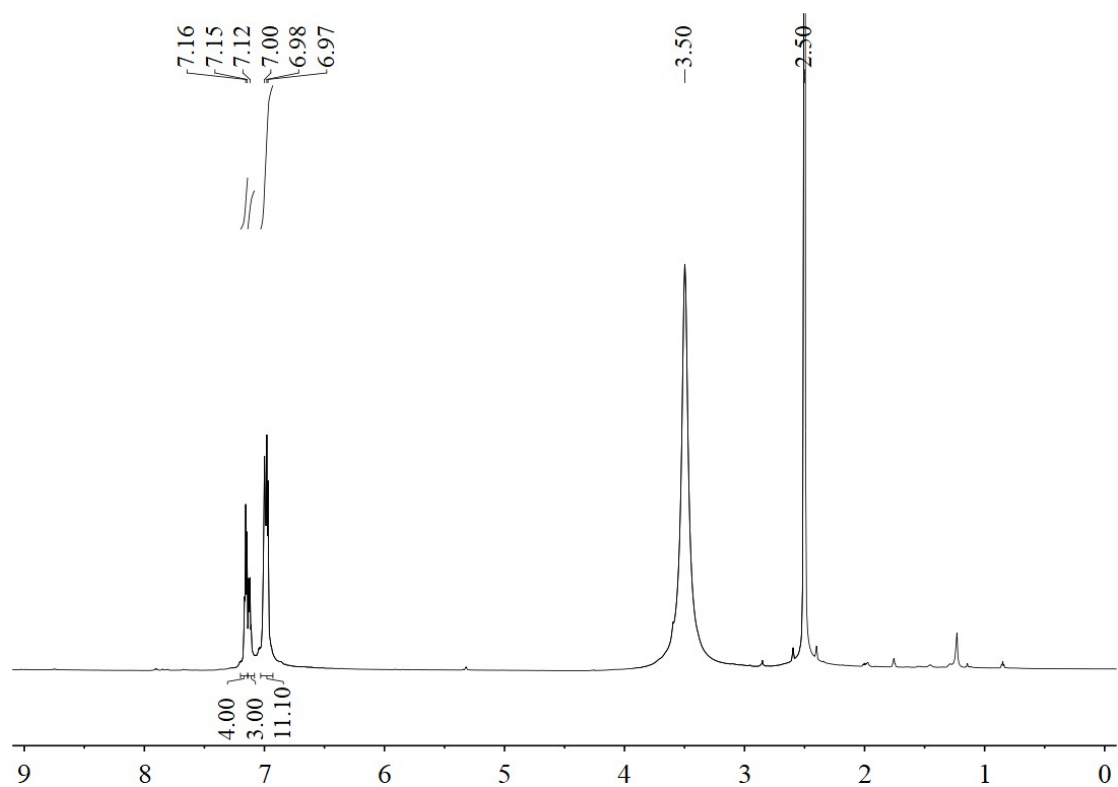

**Fig. S11**  $^1\text{H}$  NMR spectrum of  $\text{TPE}\cdot 2\text{NH}_3\cdot 2\text{NH}_2\text{SO}_3$ .

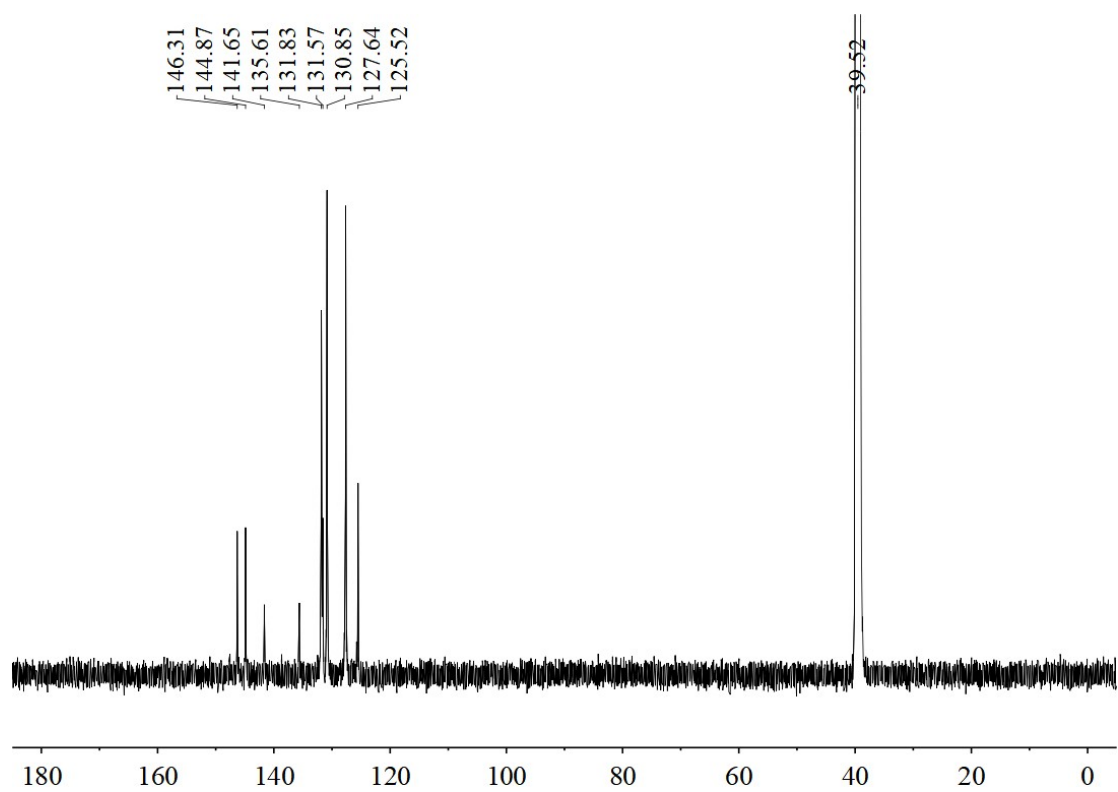

**Fig. S12**  $^{13}\text{C}$  NMR spectrum of  $\text{TPE}\cdot 2\text{NH}_3\cdot 2\text{NH}_2\text{SO}_3$ .

## 2. UV-Vis absorption spectra

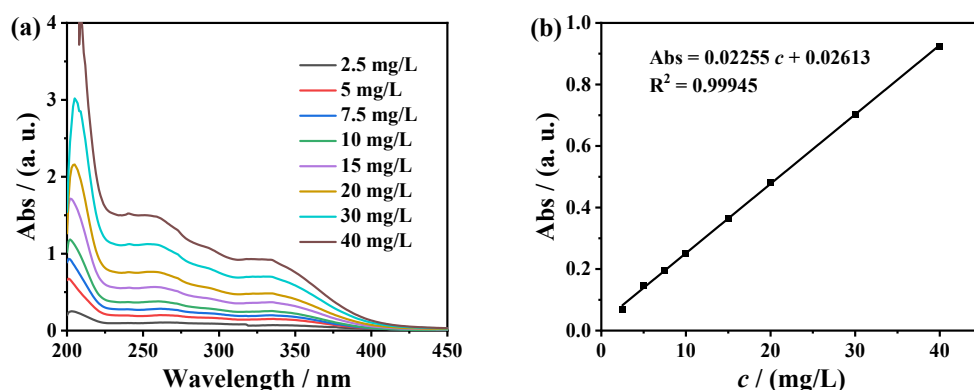

**Fig. S13** (a) UV-Vis absorption spectra of the solutions of TPE-2NH<sub>3</sub>·SO<sub>4</sub> with various concentrations in ethanol. (b) Variation of absorption intensity at 330 nm against concentration.

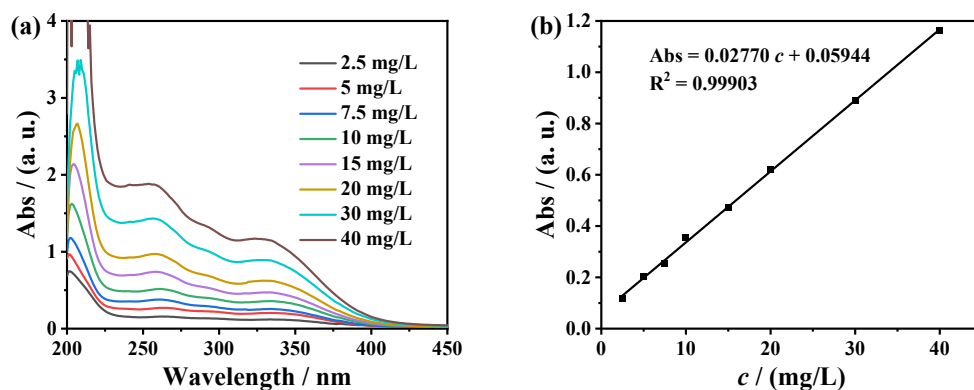

**Fig. S14** (a) UV-Vis absorption spectra of the solutions of TPE-2NH<sub>3</sub>·2Cl with various concentrations in ethanol. (b) Variation of absorption intensity at 330 nm against concentration.

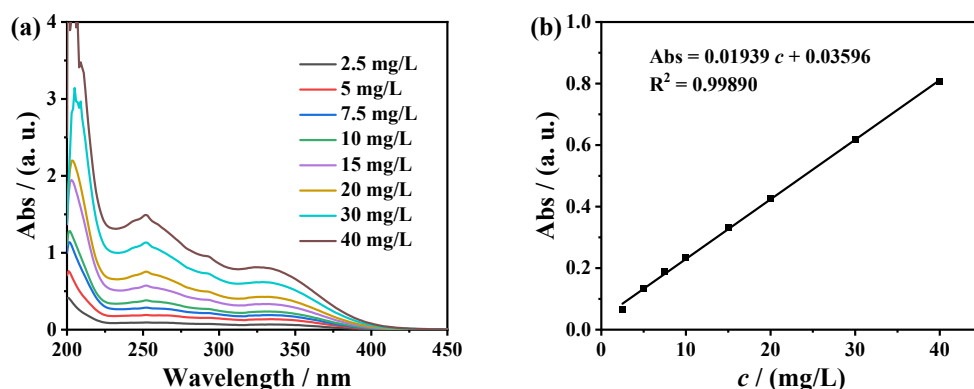

**Fig. S15** (a) UV-Vis absorption spectra of the solutions of TPE-2NH<sub>3</sub>·2Br with various concentrations in ethanol. (b) Variation of absorption intensity at 330 nm against concentration.

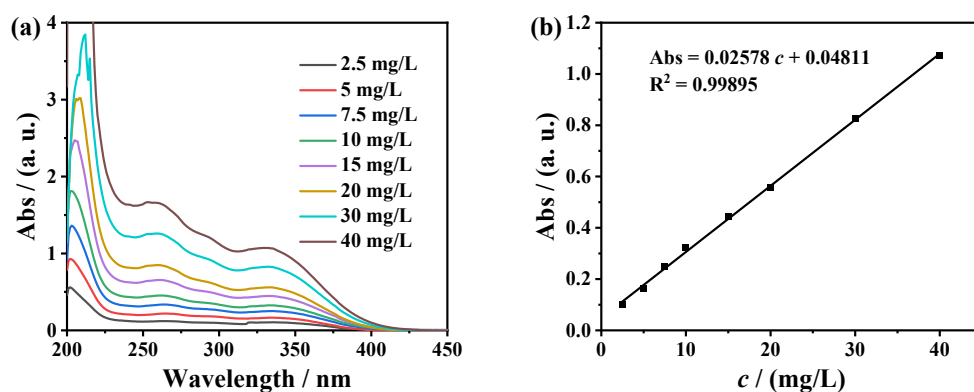

**Fig. S16** (a) UV-Vis absorption spectra of the solutions of TPE-2NH<sub>3</sub>·2NO<sub>3</sub> with various concentrations in ethanol. (b) Variation of absorption intensity at 330 nm against concentration.

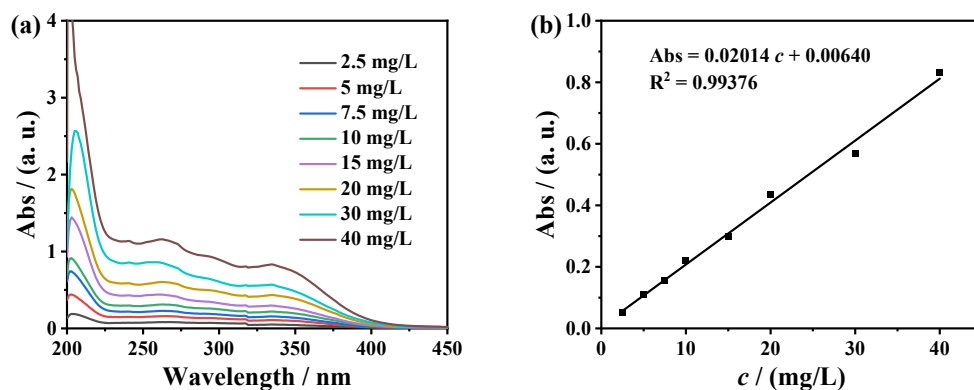

**Fig. S17** (a) UV-Vis absorption spectra of the solutions of TPE-2NH<sub>3</sub>·2NH<sub>2</sub>SO<sub>3</sub> with various concentrations in ethanol. (b) Variation of absorption intensity at 334 nm against concentration.

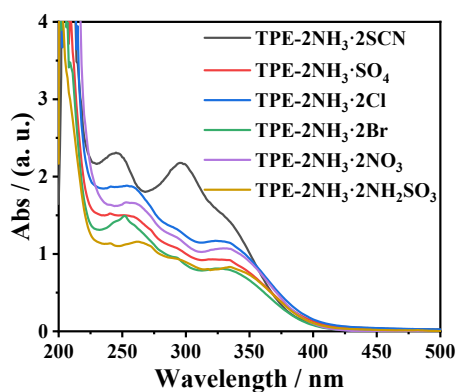

**Fig. S18** UV-Vis absorption spectra of the solutions of 40 mg/L TPE-based dicationic compounds in ethanol.

### 3. AIE characteristic study

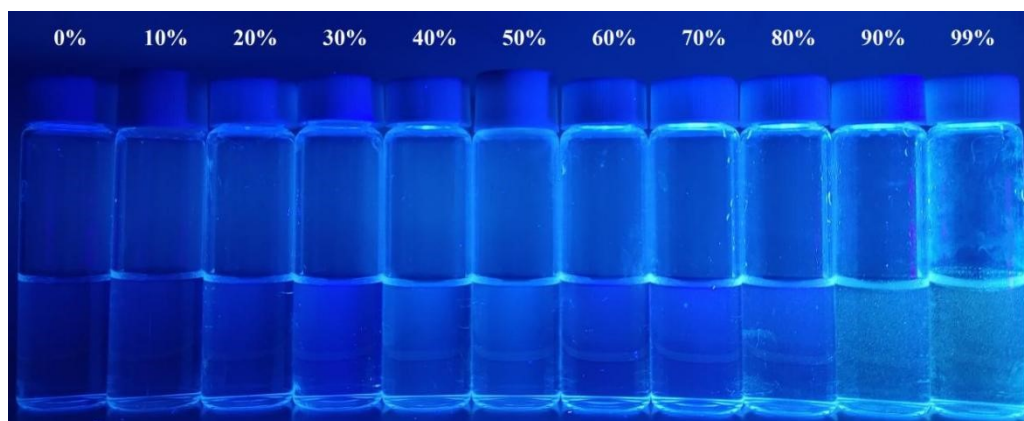

**Fig. S19** Photograph of TPE-2NH<sub>3</sub>·SO<sub>4</sub> in ethanol/water mixtures with increasing water volume fractions ( $f_{\text{water}}$ ) under 365 nm UV light excitation. Concentration: 40 mg/L.

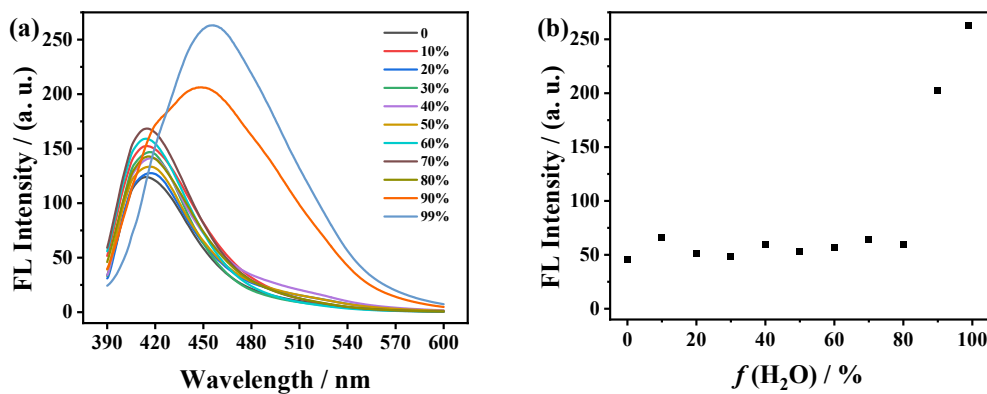

**Fig. S20** (a) Emission spectra of TPE-2NH<sub>3</sub>·SO<sub>4</sub> in ethanol/water mixtures with 365 nm UV light excitation. Concentration: 40 mg/L. (b) Variation of fluorescence intensity at 457 nm against  $f_{\text{water}}$ .

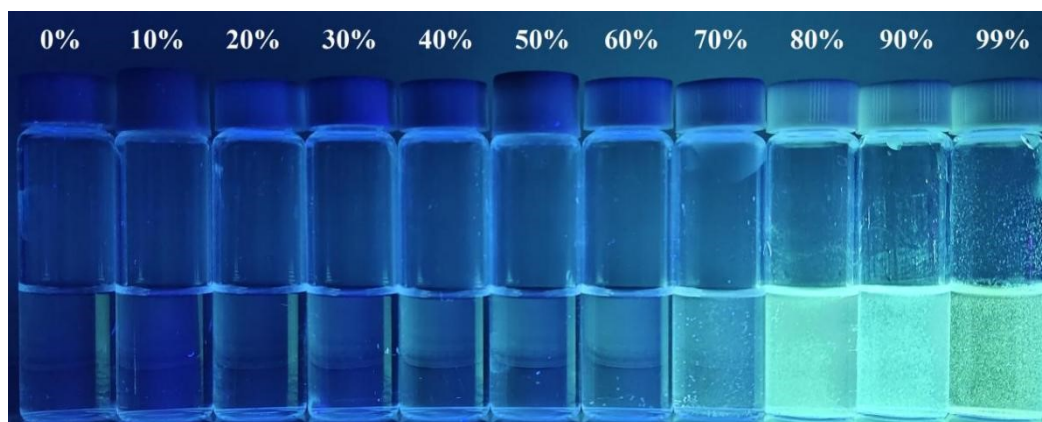

**Fig. S21** Photograph of TPE-2NH<sub>3</sub>·2Cl in ethanol/water mixtures with increasing water volume fractions ( $f_{\text{water}}$ ) under 365 nm UV light excitation. Concentration: 40 mg/L.

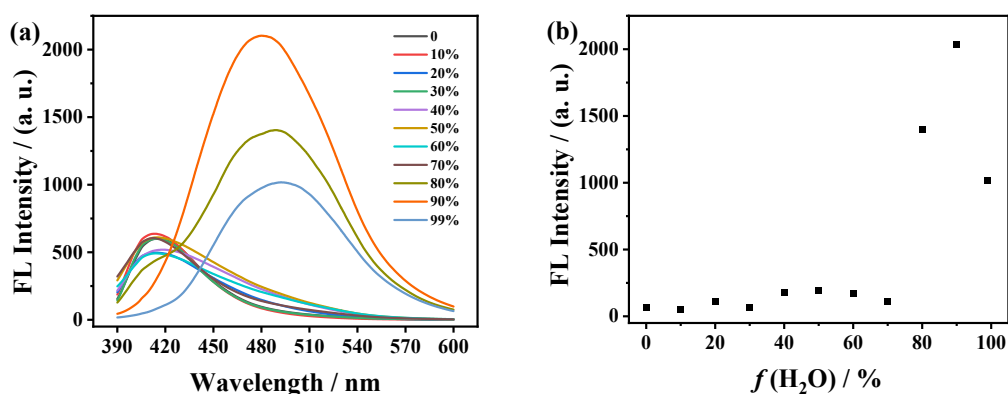

**Fig. S22** (a) Emission spectra of TPE-2NH<sub>3</sub>·2Cl in ethanol/water mixtures with 365 nm UV light excitation. Concentration: 40 mg/L. (b) Variation of fluorescence intensity at 492 nm against  $f_{\text{water}}$ .

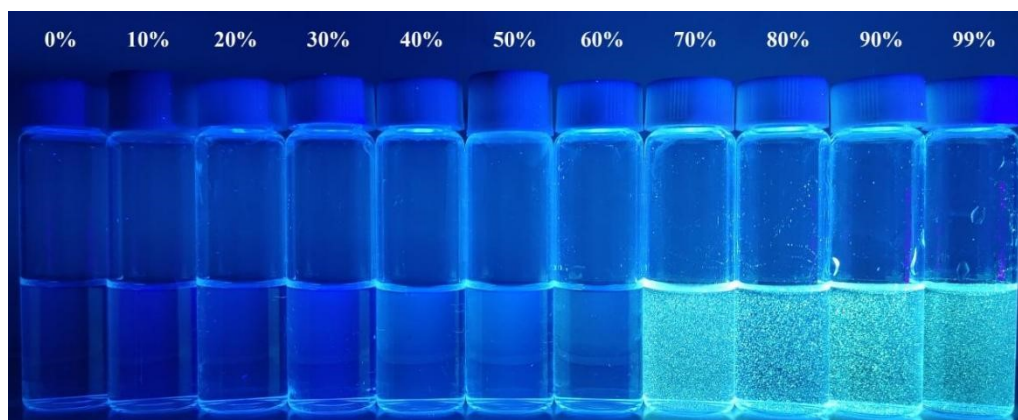

**Fig. S23** Photograph of TPE-2NH<sub>3</sub>·2Br in ethanol/water mixtures with increasing water volume fractions ( $f_{\text{water}}$ ) under 365 nm UV light excitation. Concentration: 40 mg/L.

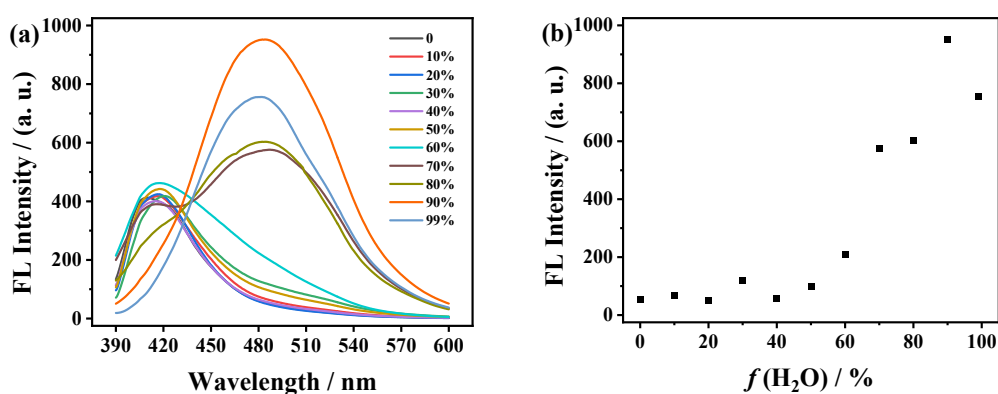

**Fig. S24** (a) Emission spectra of TPE-2NH<sub>3</sub>·2Br in ethanol/water mixtures with 365 nm UV light excitation. Concentration: 40 mg/L. (b) Variation of fluorescence intensity at 484 nm against  $f_{\text{water}}$ .

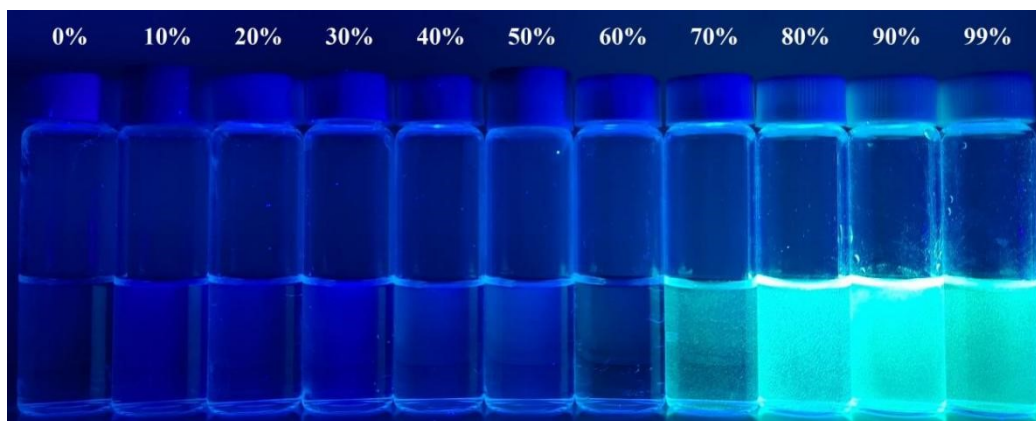

**Fig. S25** Photograph of TPE-2NH<sub>3</sub>·2NO<sub>3</sub> in ethanol/water mixtures with increasing water volume fractions ( $f_{\text{water}}$ ) under 365 nm UV light excitation. Concentration: 40 mg/L.

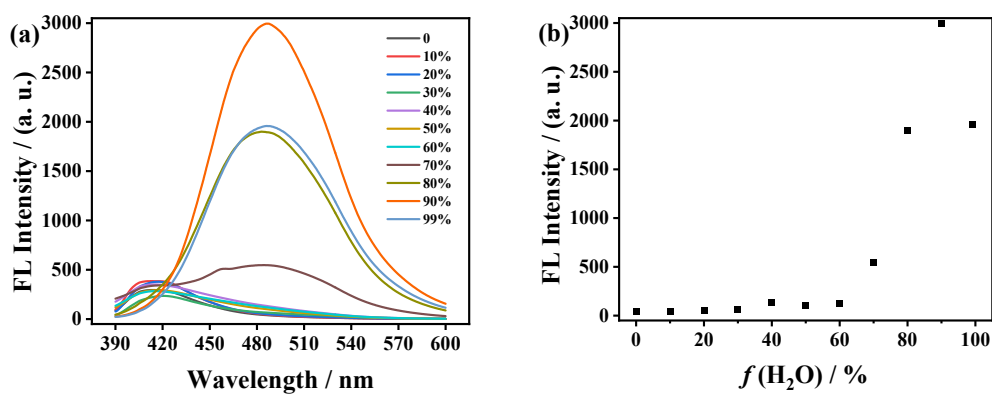

**Fig. S26** (a) Emission spectra of TPE-2NH<sub>3</sub>·2NO<sub>3</sub> in ethanol/water mixtures with 365 nm UV light excitation. Concentration: 40 mg/L. (b) Variation of fluorescence intensity at 486 nm against  $f_{\text{water}}$ .

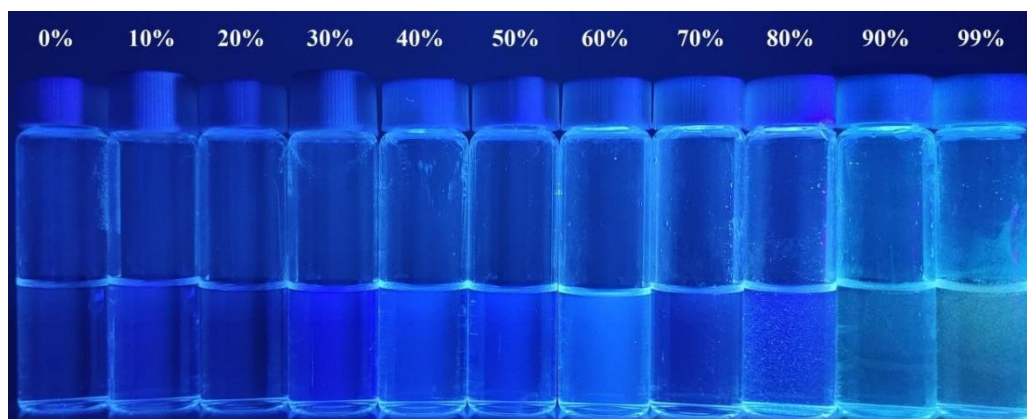

**Fig. S27** Photograph of TPE-2NH<sub>3</sub>·2NH<sub>2</sub>SO<sub>3</sub> in ethanol/water mixtures with increasing water volume fractions ( $f_{\text{water}}$ ) under 365 nm UV light excitation. Concentration: 40 mg/L.

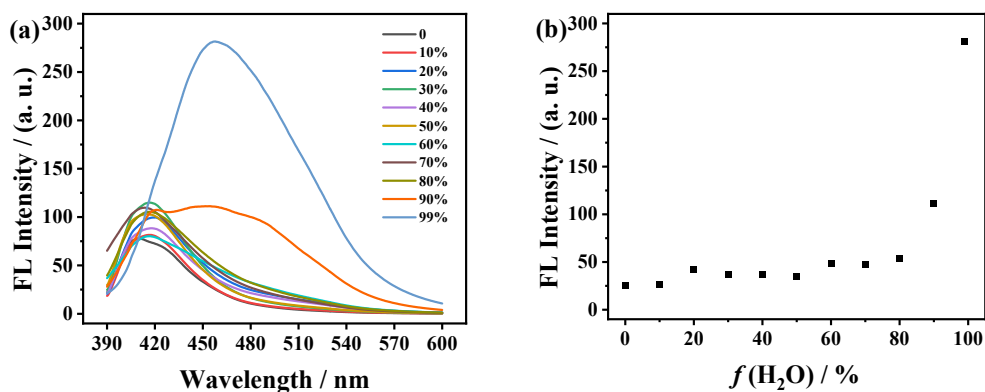

**Fig. S28** (a) Emission spectra of TPE-2NH<sub>3</sub>·2NH<sub>2</sub>SO<sub>3</sub> in ethanol/water mixtures with 365 nm UV light excitation. Concentration: 40 mg/L. (b) Variation of fluorescence intensity at 457 nm against  $f_{\text{water}}$ .

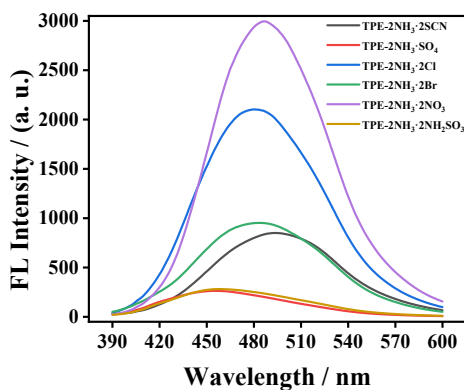

**Fig. S29** Emission spectra of 40 mg/L TPE-based dicationic compounds in ethanol/water mixtures with maximum fluorescence intensity under 365 nm UV light excitation.



#### 4. Electrochemical measurements

**Figure S30** Equivalent electrical circuit models used to fit EIS data: in 0.5 M H<sub>2</sub>SO<sub>4</sub> (left) and in 0.5 M H<sub>2</sub>SO<sub>4</sub> in presence of TPE-based compounds (right).

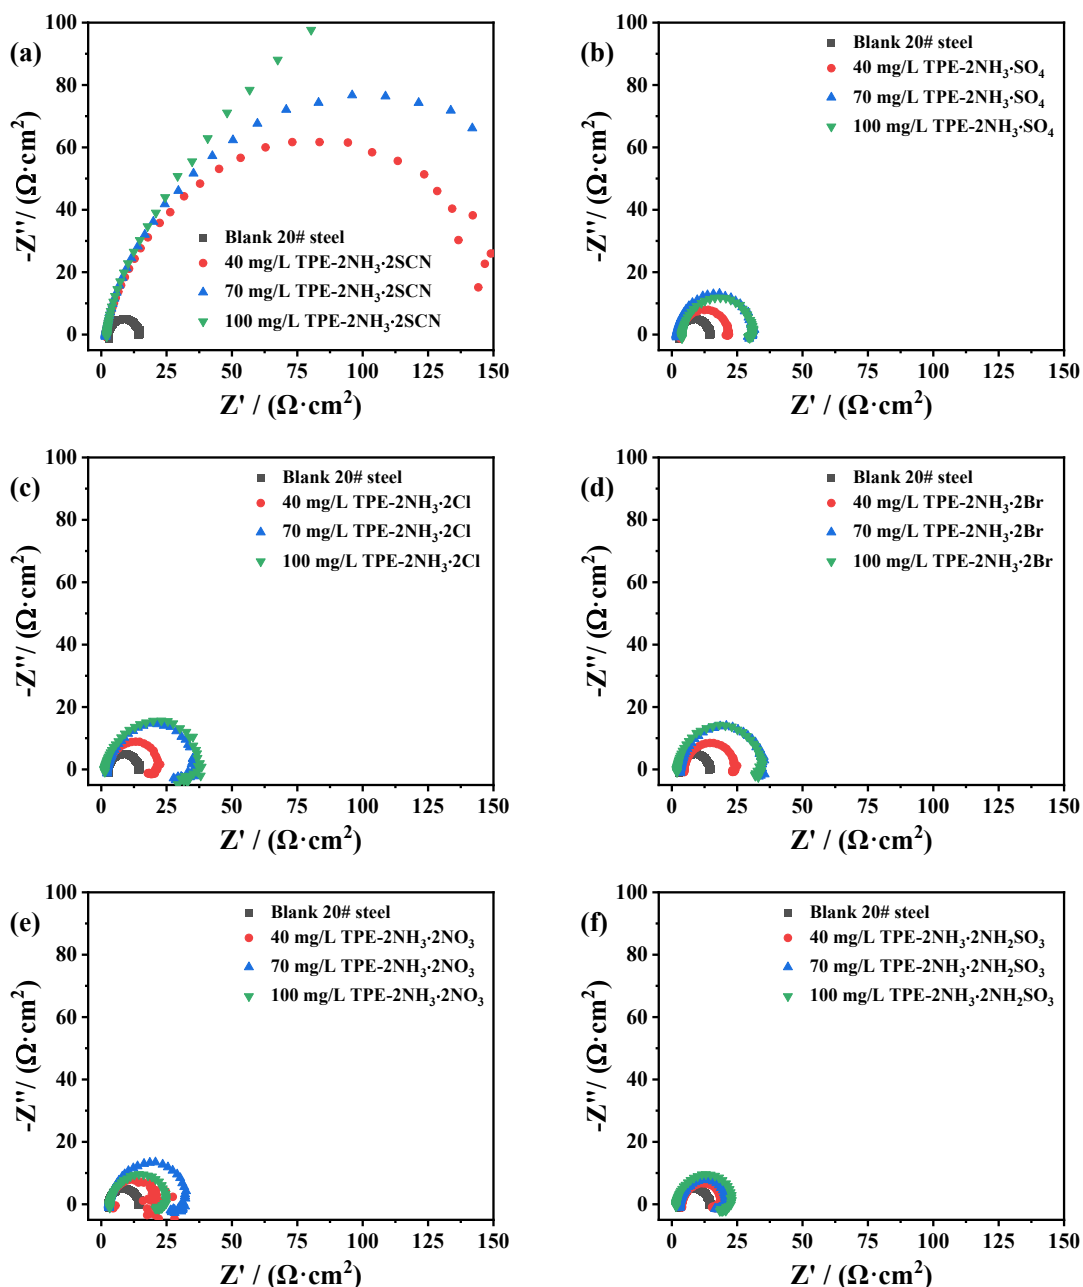

**Fig. S31** EIS curves for 20# steel in the absence or presence of various concentrations of (a) TPE-2NH<sub>3</sub>·2SCN; (b) TPE-2NH<sub>3</sub>·SO<sub>4</sub>; (c) TPE-2NH<sub>3</sub>·2Cl; (d) TPE-2NH<sub>3</sub>·2Br; (e) TPE-2NH<sub>3</sub>·2NO<sub>3</sub>; (f) TPE-2NH<sub>3</sub>·2NH<sub>2</sub>SO<sub>3</sub>.



**Table S1** Electrochemical parameters of 20# steel in the absence or presence of different concentrations of TPE-based dicationic compounds by EIS measurements in 0.5 M H<sub>2</sub>SO<sub>4</sub>.

| Inhibitor                                                | $c / (\text{mg/L})$ | $R_s / (\Omega/\text{cm}^2)$ | $R_{ct} / (\Omega/\text{cm}^2)$ | $\eta_E / \%$ |
|----------------------------------------------------------|---------------------|------------------------------|---------------------------------|---------------|
| Blank                                                    | —                   | 2.7                          | 11.8                            | —             |
| <b>TPE-2NH<sub>3</sub>·2SCN</b>                          | 40                  | 1.6                          | 156.5                           | 92.5          |
|                                                          | 70                  | 1.5                          | 192.2                           | 93.9          |
|                                                          | 100                 | 1.9                          | 287.9                           | 95.9          |
| <b>TPE-2NH<sub>3</sub>·SO<sub>4</sub></b>                | 40                  | 3.3                          | 18.6                            | 36.5          |
|                                                          | 70                  | 1.9                          | 29.4                            | 59.9          |
|                                                          | 100                 | 3.8                          | 27.9                            | 57.7          |
| <b>TPE-2NH<sub>3</sub>·2Cl</b>                           | 40                  | 1.9                          | 20.8                            | 43.4          |
|                                                          | 70                  | 2.2                          | 35.0                            | 66.3          |
|                                                          | 100                 | 2.1                          | 35.1                            | 66.4          |
| <b>TPE-2NH<sub>3</sub>·2Br</b>                           | 40                  | 4.7                          | 19.9                            | 40.8          |
|                                                          | 70                  | 3.2                          | 32.5                            | 63.7          |
|                                                          | 100                 | 2.5                          | 34.0                            | 65.3          |
| <b>TPE-2NH<sub>3</sub>·2NO<sub>3</sub></b>               | 40                  | 3.3                          | 20.5                            | 42.3          |
|                                                          | 70                  | 2.9                          | 31.1                            | 62.1          |
|                                                          | 100                 | 3.2                          | 22.7                            | 48.1          |
| <b>TPE-2NH<sub>3</sub>·2NH<sub>2</sub>SO<sub>3</sub></b> | 40                  | 3.9                          | 15.4                            | 23.5          |
|                                                          | 70                  | 3.0                          | 18.5                            | 36.4          |
|                                                          | 100                 | 2.7                          | 22.8                            | 48.3          |

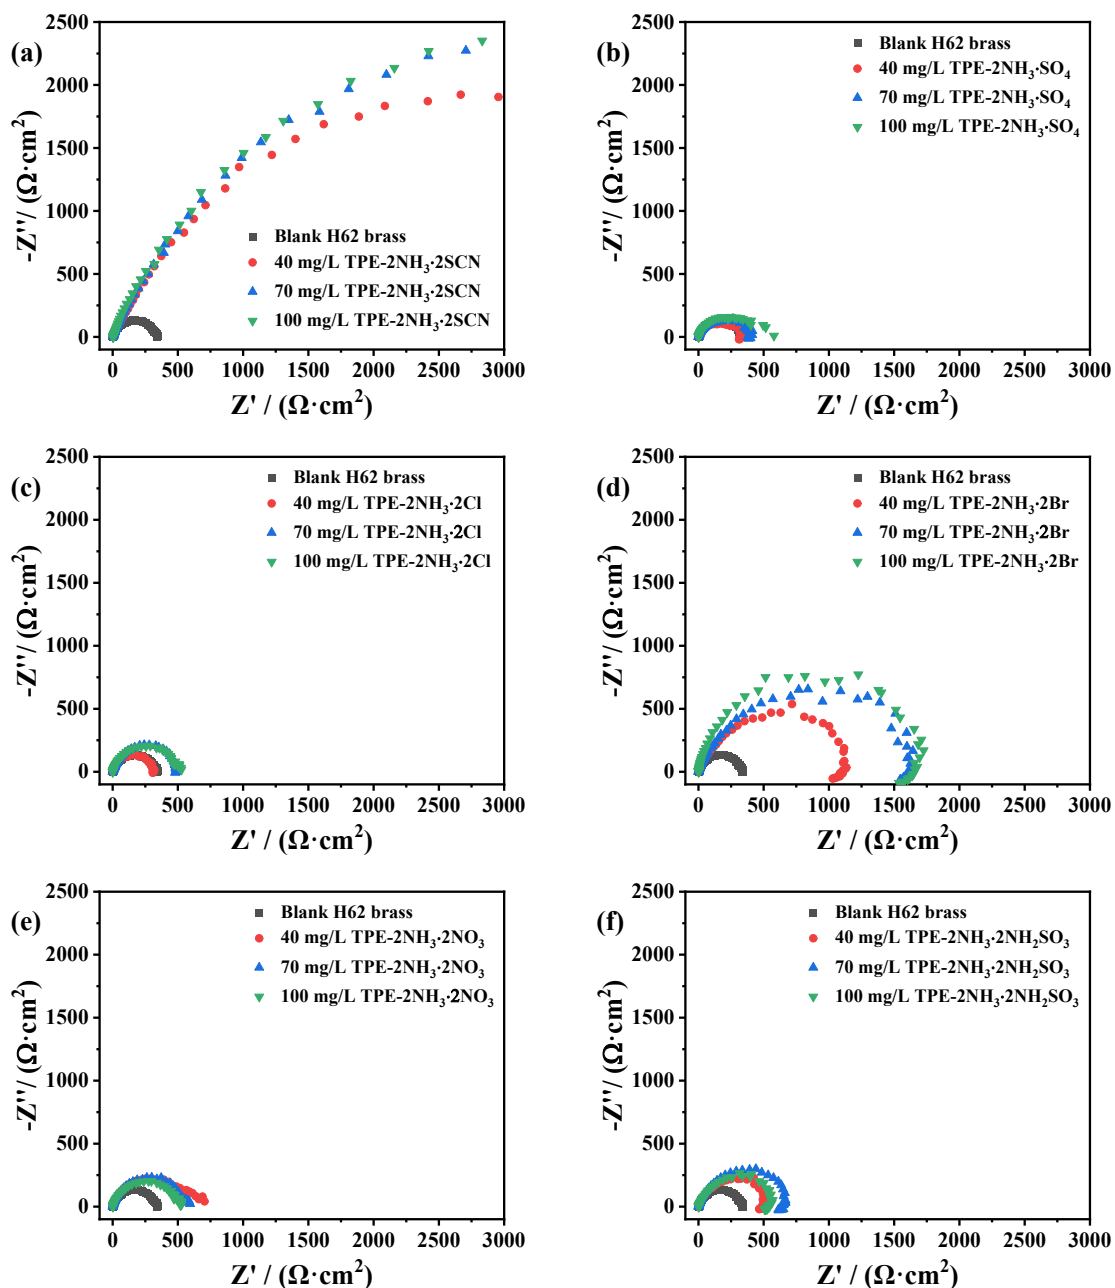

**Fig. S32** EIS curves for H62 brass in the absence or presence of various concentrations of (a) TPE- $2\text{NH}_3 \cdot 2\text{SCN}$ ; (b) TPE- $2\text{NH}_3 \cdot \text{SO}_4$ ; (c) TPE- $2\text{NH}_3 \cdot 2\text{Cl}$ ; (d) TPE- $2\text{NH}_3 \cdot 2\text{Br}$ ; (e) TPE- $2\text{NH}_3 \cdot 2\text{NO}_3$ ; (f) TPE- $2\text{NH}_3 \cdot 2\text{NH}_2\text{SO}_3$ .

**Table S2** Electrochemical parameters of H62 brass in the absence or presence of different concentrations of TPE-based dicationic compounds by EIS measurements in 0.5 M H<sub>2</sub>SO<sub>4</sub>.

| Inhibitor                                                | $c / (\text{mg/L})$ | $R_s / (\Omega/\text{cm}^2)$ | $R_{ct} / (\Omega/\text{cm}^2)$ | $\eta_E / \%$ |
|----------------------------------------------------------|---------------------|------------------------------|---------------------------------|---------------|
| Blank                                                    | —                   | 2.0                          | 331.2                           | —             |
| <b>TPE-2NH<sub>3</sub>·2SCN</b>                          | 40                  | 2.1                          | 5492.0                          | 94.0          |
|                                                          | 70                  | 2.5                          | 6515.0                          | 94.9          |
|                                                          | 100                 | 2.9                          | 6773.0                          | 95.1          |
| <b>TPE-2NH<sub>3</sub>·SO<sub>4</sub></b>                | 40                  | 1.1                          | 341.1                           | 2.9           |
|                                                          | 70                  | 1.6                          | 400.8                           | 17.4          |
|                                                          | 100                 | 1.3                          | 508.0                           | 34.8          |
| <b>TPE-2NH<sub>3</sub>·2Cl</b>                           | 40                  | 2.2                          | 312.9                           | -5.8          |
|                                                          | 70                  | 1.4                          | 497.8                           | 33.5          |
|                                                          | 100                 | 1.3                          | 495.2                           | 33.1          |
| <b>TPE-2NH<sub>3</sub>·2Br</b>                           | 40                  | 2.3                          | 1104.0                          | 70.0          |
|                                                          | 70                  | 1.8                          | 1610.0                          | 79.4          |
|                                                          | 100                 | 2.1                          | 1650.8                          | 79.9          |
| <b>TPE-2NH<sub>3</sub>·2NO<sub>3</sub></b>               | 40                  | 1.8                          | 597.9                           | 44.6          |
|                                                          | 70                  | 1.5                          | 554.2                           | 40.2          |
|                                                          | 100                 | 1.5                          | 534.0                           | 38.0          |
| <b>TPE-2NH<sub>3</sub>·2NH<sub>2</sub>SO<sub>3</sub></b> | 40                  | 2.3                          | 502.1                           | 34.0          |
|                                                          | 70                  | 2.3                          | 659.8                           | 49.8          |
|                                                          | 100                 | 2.3                          | 559.7                           | 40.8          |

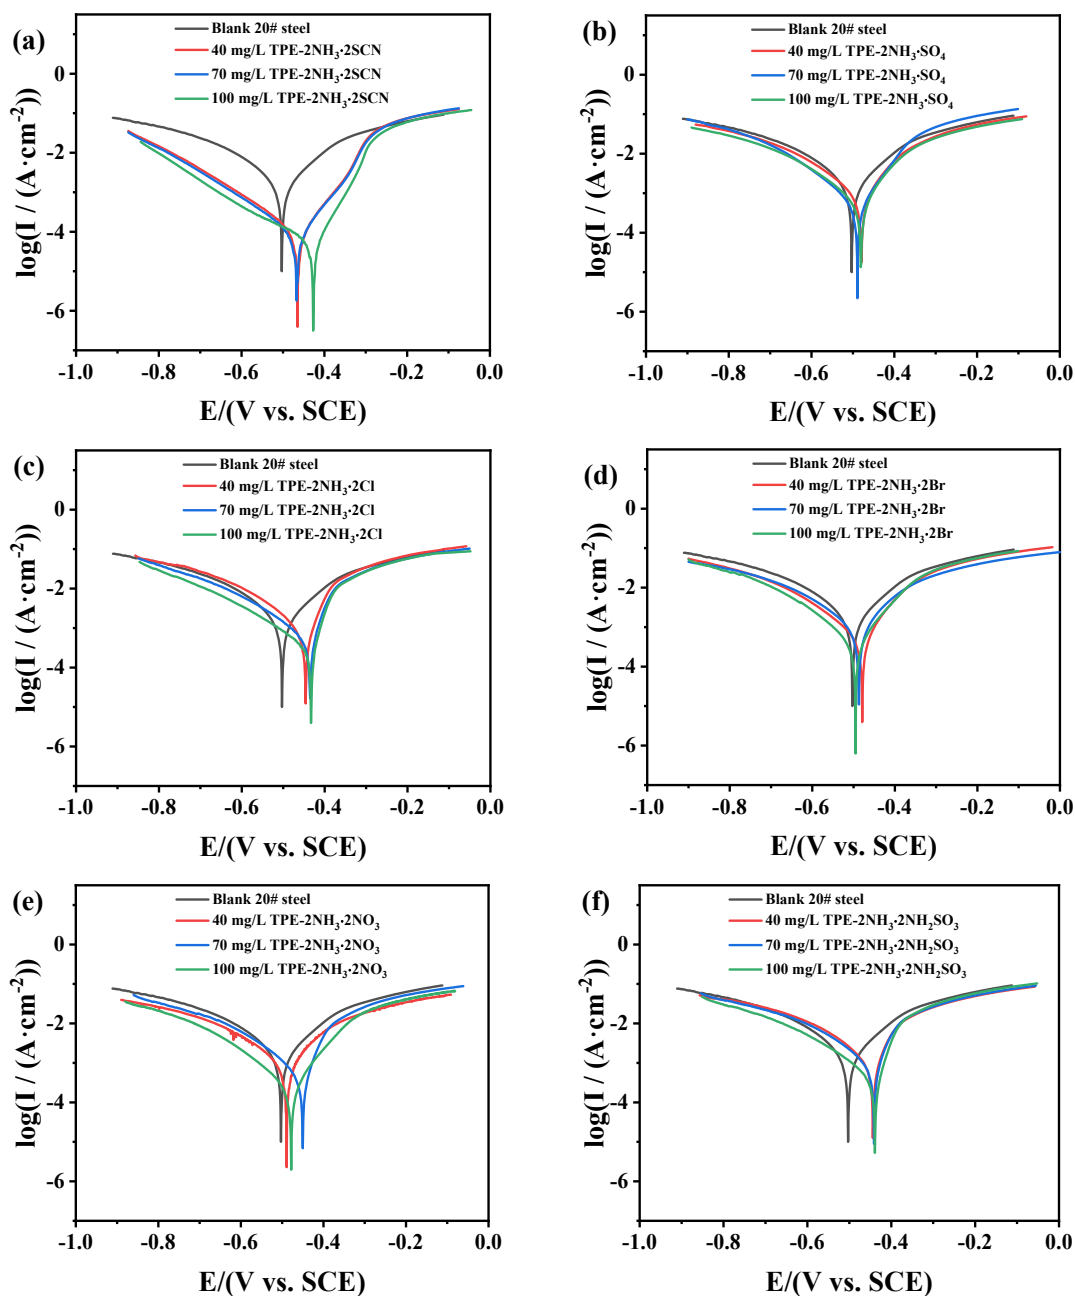

**Fig. S33** PDP curves for 20# steel in the absence or presence of various concentrations of (a) TPE-2NH<sub>3</sub>·2SCN; (b) TPE-2NH<sub>3</sub>·SO<sub>4</sub>; (c) TPE-2NH<sub>3</sub>·2Cl; (d) TPE-2NH<sub>3</sub>·2Br; (e) TPE-2NH<sub>3</sub>·2NO<sub>3</sub>; (f) TPE-2NH<sub>3</sub>·2NH<sub>2</sub>SO<sub>3</sub>.

**Table S3** Electrochemical parameters of 20# steel in the absence or presence of different concentrations of TPE-based dicationic compounds by potentiodynamic polarization measurements in 0.5 M H<sub>2</sub>SO<sub>4</sub>.

| Inhibitor                                                | <i>c</i> /(mg/L) | <i>I</i> <sub>corr</sub> /(μA/cm <sup>2</sup> ) | <i>E</i> <sub>corr</sub> /V | <i>β</i> <sub>c</sub> /(mV/dec) | <i>β</i> <sub>a</sub> /(mV/dec) | <i>η</i> <sub>p</sub> /% |
|----------------------------------------------------------|------------------|-------------------------------------------------|-----------------------------|---------------------------------|---------------------------------|--------------------------|
| Blank                                                    | —                | 1701.0                                          | -0.503                      | 146.3                           | 113.2                           | —                        |
| <b>TPE-2NH<sub>3</sub>·2SCN</b>                          | 40               | 97.3                                            | -0.465                      | 139.3                           | 77.2                            | 94.3                     |
|                                                          | 70               | 97.3                                            | -0.467                      | 140.5                           | 80.4                            | 94.3                     |
|                                                          | 100              | 55.1                                            | -0.427                      | 203.2                           | 51.5                            | 96.8                     |
| <b>TPE-2NH<sub>3</sub>·SO<sub>4</sub></b>                | 40               | 1046.0                                          | -0.479                      | 136.6                           | 109.2                           | 38.5                     |
|                                                          | 70               | 621.9                                           | -0.489                      | 126.1                           | 71.9                            | 63.4                     |
|                                                          | 100              | 718.0                                           | -0.481                      | 136.0                           | 100.8                           | 57.8                     |
| <b>TPE-2NH<sub>3</sub>·2Cl</b>                           | 40               | 1331.0                                          | -0.446                      | 135.2                           | 154.9                           | 21.8                     |
|                                                          | 70               | 1155.0                                          | -0.435                      | 142.0                           | 170.4                           | 32.1                     |
|                                                          | 100              | 786.1                                           | -0.433                      | 149.3                           | 163.3                           | 53.8                     |
| <b>TPE-2NH<sub>3</sub>·2Br</b>                           | 40               | 1096.0                                          | -0.487                      | 144.2                           | 123.0                           | 35.6                     |
|                                                          | 70               | 631.5                                           | -0.479                      | 131.1                           | 96.5                            | 62.9                     |
|                                                          | 100              | 489.3                                           | -0.495                      | 124.3                           | 88.6                            | 71.2                     |
| <b>TPE-2NH<sub>3</sub>·2NO<sub>3</sub></b>               | 40               | 1143.1                                          | -0.489                      | 155.4                           | 127.6                           | 32.8                     |
|                                                          | 70               | 844.7                                           | -0.45                       | 132.9                           | 145.6                           | 50.3                     |
|                                                          | 100              | 589.0                                           | -0.478                      | 166.8                           | 139.6                           | 65.4                     |
| <b>TPE-2NH<sub>3</sub>·2NH<sub>2</sub>SO<sub>3</sub></b> | 40               | 1794.0                                          | -0.444                      | 142.3                           | 167.1                           | -5.5                     |
|                                                          | 70               | 1757.0                                          | -0.441                      | 141.2                           | 182.2                           | -3.3                     |
|                                                          | 100              | 827.6                                           | -0.439                      | 142.3                           | 155.0                           | 51.3                     |

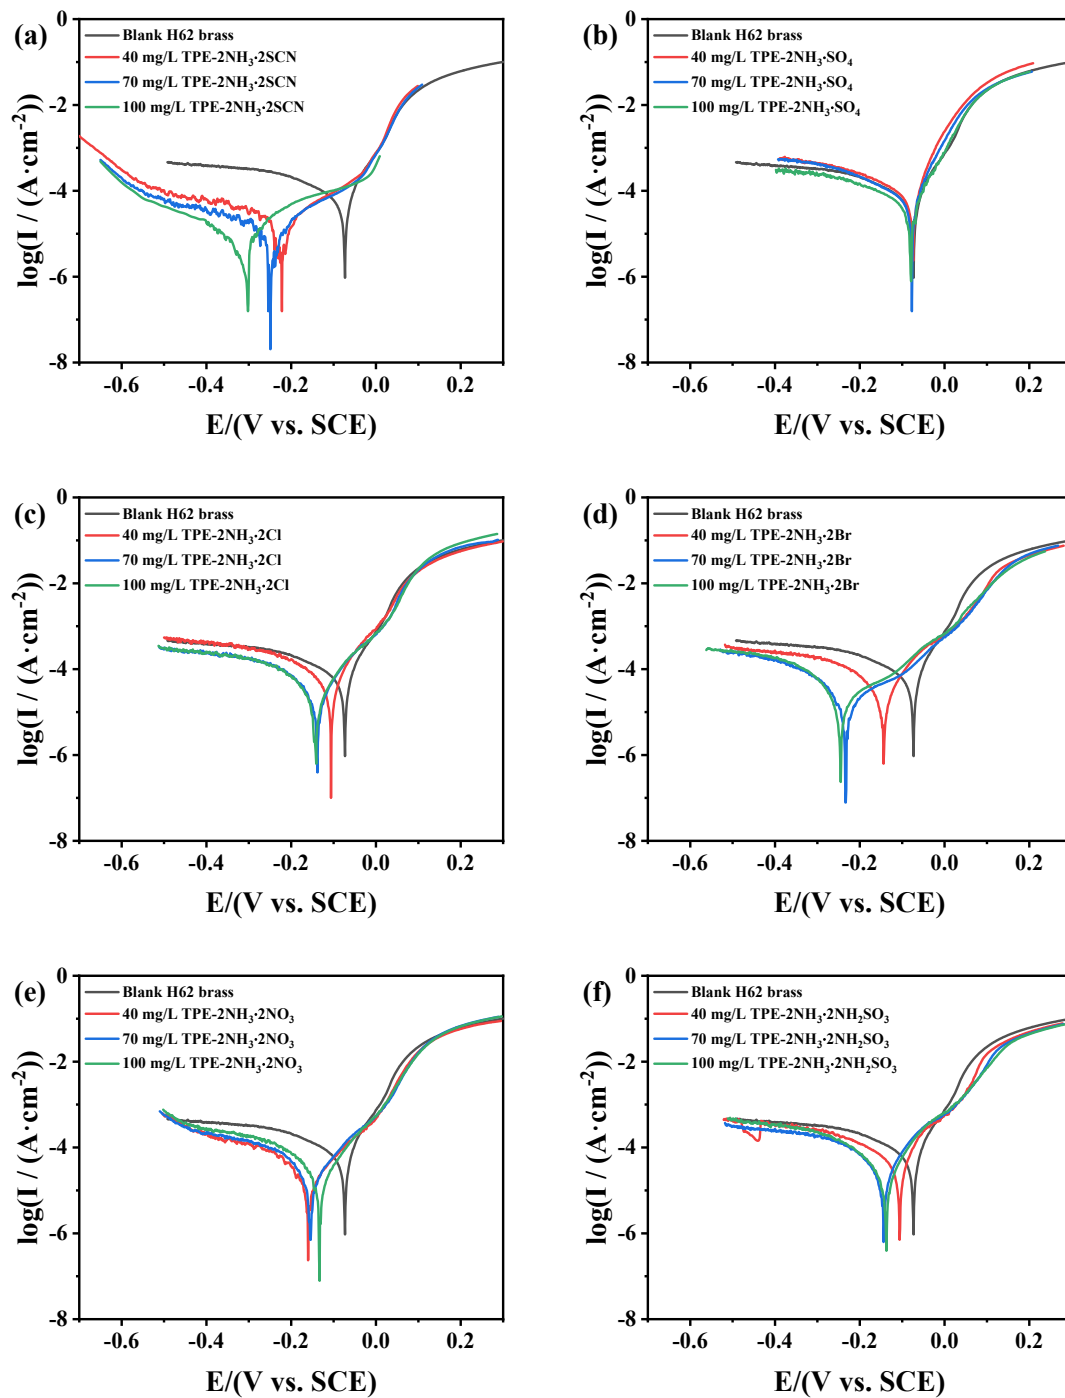

**Fig. S34** PDP curves for H62 brass in the absence or presence of various concentrations of (a) TPE- $2\text{NH}_3 \cdot 2\text{SCN}$ ; (b) TPE- $2\text{NH}_3 \cdot \text{SO}_4$ ; (c) TPE- $2\text{NH}_3 \cdot 2\text{Cl}$ ; (d) TPE- $2\text{NH}_3 \cdot 2\text{Br}$ ; (e) TPE- $2\text{NH}_3 \cdot 2\text{NO}_3$ ; (f) TPE- $2\text{NH}_3 \cdot 2\text{NH}_2\text{SO}_3$ .



**Table S4** Electrochemical parameters of H62 brass in the absence or presence of different concentrations of TPE-based dicationic compounds by potentiodynamic polarization measurements in 0.5 M H<sub>2</sub>SO<sub>4</sub>.

| Inhibitor                                                | <i>c</i> /(mg/L) | <i>I</i> <sub>corr</sub> /(μA/cm <sup>2</sup> ) | <i>E</i> <sub>corr</sub> /V | <i>β</i> <sub>c</sub> /(mV/dec) | <i>β</i> <sub>a</sub> /(mV/dec) | <i>η</i> <sub>p</sub> /% |
|----------------------------------------------------------|------------------|-------------------------------------------------|-----------------------------|---------------------------------|---------------------------------|--------------------------|
| Blank                                                    | —                | 84.7                                            | -0.073                      | 227.0                           | 55.0                            | —                        |
| <b>TPE-2NH<sub>3</sub>·2SCN</b>                          | 40               | 22.8                                            | -0.222                      | 366.3                           | 180.6                           | 73.1                     |
|                                                          | 70               | 10.9                                            | -0.249                      | 246.1                           | 164.8                           | 87.1                     |
|                                                          | 100              | 7.1                                             | -0.302                      | 147.1                           | 180.0                           | 91.7                     |
| <b>TPE-2NH<sub>3</sub>·SO<sub>4</sub></b>                | 40               | 90.3                                            | -0.074                      | 224.6                           | 68.4                            | -6.6                     |
|                                                          | 70               | 67.7                                            | -0.077                      | 211.1                           | 59.3                            | 20.1                     |
|                                                          | 100              | 44.7                                            | -0.079                      | 264.9                           | 54.3                            | 47.2                     |
| <b>TPE-2NH<sub>3</sub>·2Cl</b>                           | 40               | 62.2                                            | -0.106                      | 206.7                           | 92.3                            | 26.5                     |
|                                                          | 70               | 36.5                                            | -0.138                      | 193.8                           | 105.0                           | 57.0                     |
|                                                          | 100              | 31.0                                            | -0.141                      | 205.1                           | 109.0                           | 63.5                     |
| <b>TPE-2NH<sub>3</sub>·2Br</b>                           | 40               | 35.5                                            | -0.234                      | 186.9                           | 232.8                           | 58.1                     |
|                                                          | 70               | 27.3                                            | -0.187                      | 159.8                           | 95.7                            | 67.8                     |
|                                                          | 100              | 36.4                                            | -0.245                      | 177.5                           | 213.1                           | 57.0                     |
| <b>TPE-2NH<sub>3</sub>·2NO<sub>3</sub></b>               | 40               | 42.0                                            | -0.16                       | 214.3                           | 102.0                           | 50.4                     |
|                                                          | 70               | 39.0                                            | -0.155                      | 266.1                           | 99.3                            | 54.0                     |
|                                                          | 100              | 31.3                                            | -0.133                      | 184.6                           | 94.6                            | 63.0                     |
| <b>TPE-2NH<sub>3</sub>·2NH<sub>2</sub>SO<sub>3</sub></b> | 40               | 77.9                                            | -0.106                      | 210.7                           | 143.4                           | 8.1                      |
|                                                          | 70               | 41.6                                            | -0.144                      | 210.3                           | 114.7                           | 50.9                     |
|                                                          | 100              | 32.6                                            | -0.137                      | 165.7                           | 104.1                           | 61.5                     |

## 5. SEM images

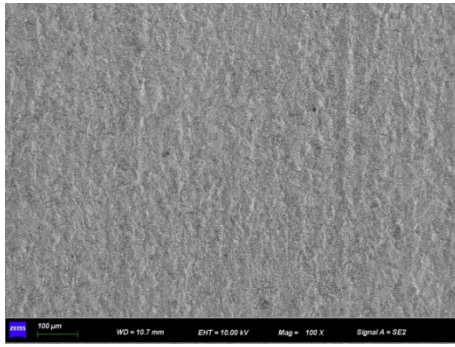

(a)

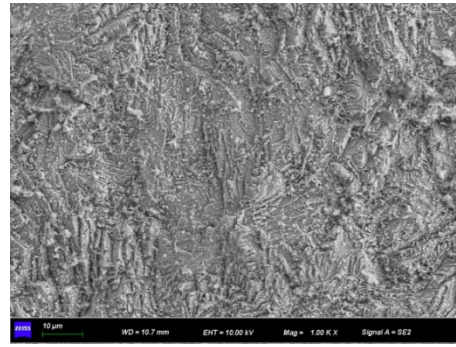

(b)

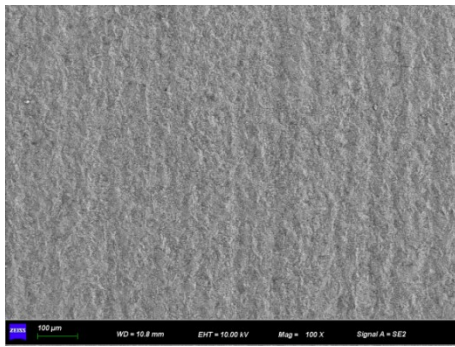

(c)

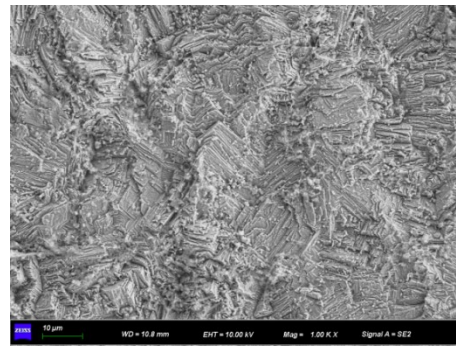

(d)

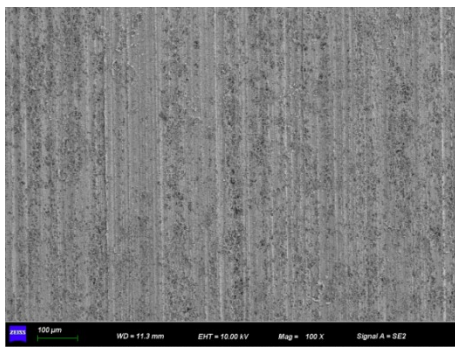

(e)

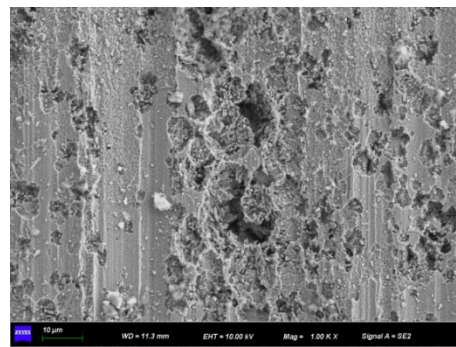

(f)

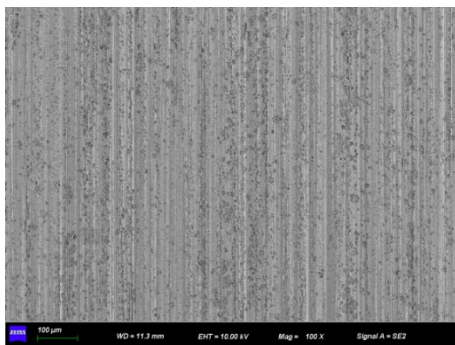

(g)

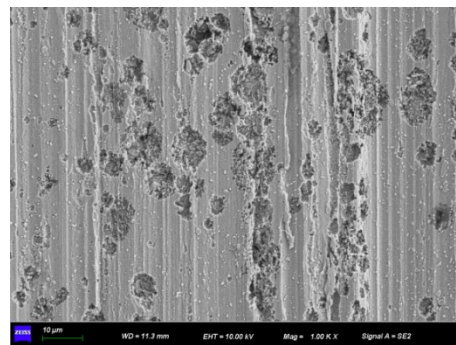

(h)

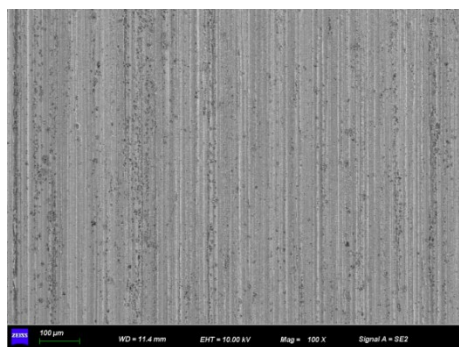

(i)

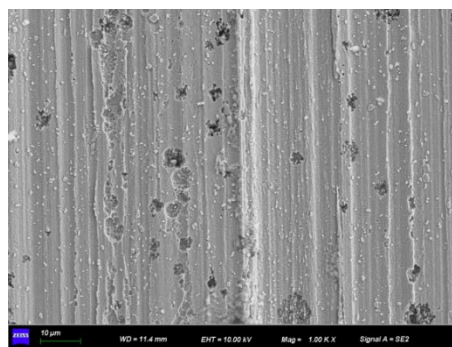

(j)

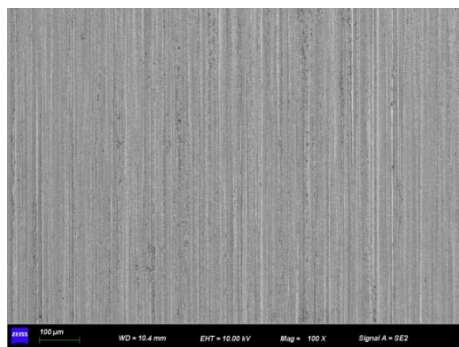

(k)

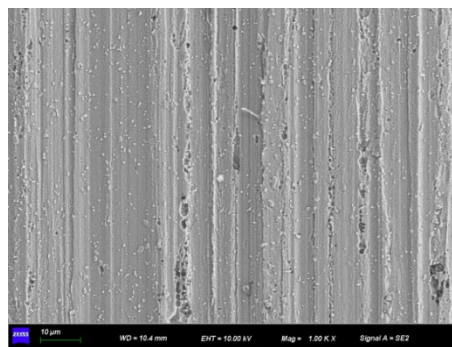

(l)

**Fig. S35** SEM images of 20# steel coupons in the presence of different concentrations of TPE- $2\text{NH}_3 \cdot 2\text{SCN}$  after weight loss experiment: (a, b) 5 mg/L; (c, d) 10 mg/L; (e, f) 20 mg/L; (g, h) 40 mg/L; (i, j) 70 mg/L; (k, l) 200 mg/L. Scale: 100  $\mu\text{m}$  for (a, c, e, g, i, k) and 10  $\mu\text{m}$  for (b, d, f, h, j, l).

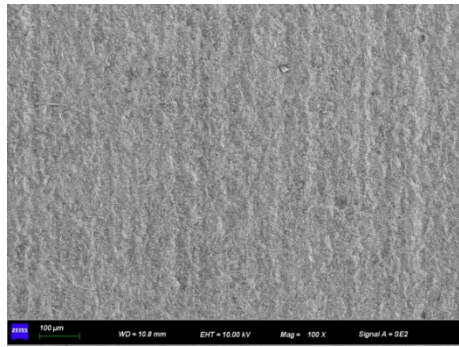

(a)

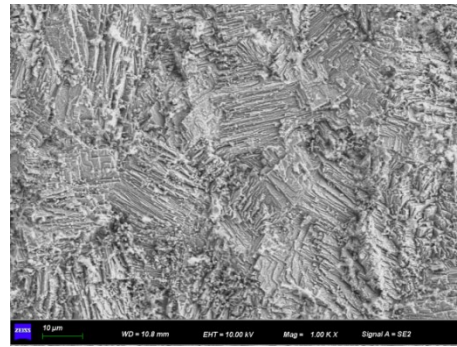

(b)

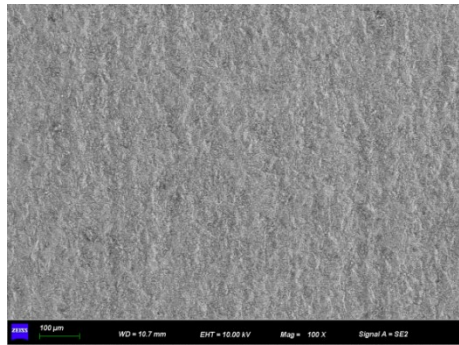

(c)

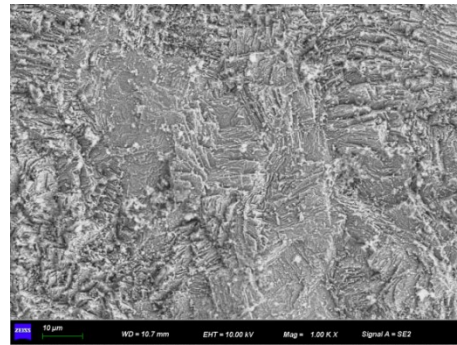

(d)

**Fig. S36** SEM images of 20# steel coupons in the presence of different concentrations of TPE- $2\text{NH}_3 \cdot \text{SO}_4$  after weight loss experiment: (a, b) 40 mg/L; (c, d) 70 mg/L. Scale: 100  $\mu\text{m}$  for (a, c) and 10  $\mu\text{m}$  for (b, d).

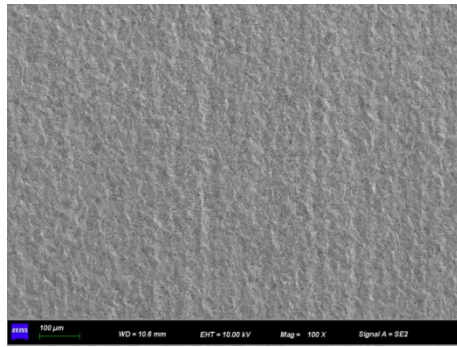

(a)

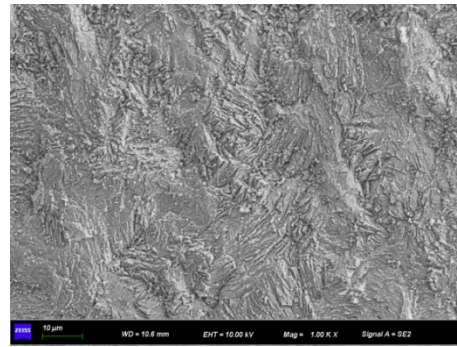

(b)

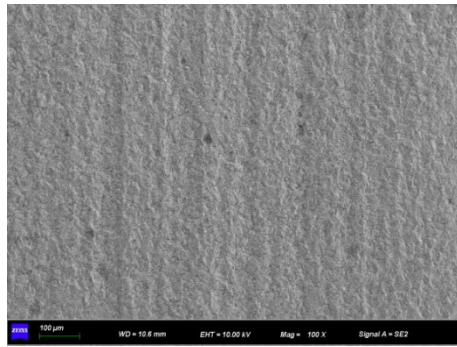

(c)

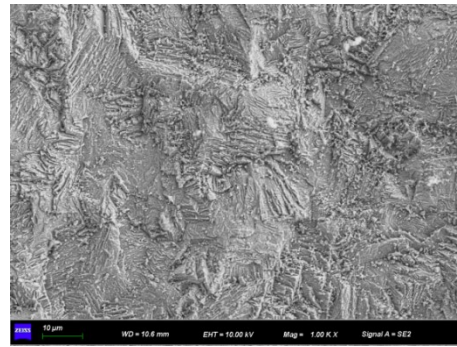

(d)

**Fig. S37** SEM images of 20# steel coupons in the presence of different concentrations of TPE- $2\text{NH}_3 \cdot 2\text{Cl}$  after weight loss experiment: (a, b) 40 mg/L; (c, d) 70 mg/L. Scale: 100  $\mu\text{m}$  for (a, c) and 10  $\mu\text{m}$  for (b, d).

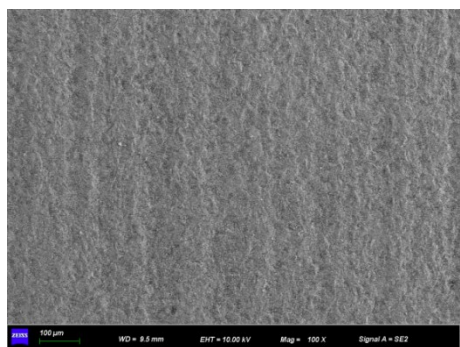

(a)

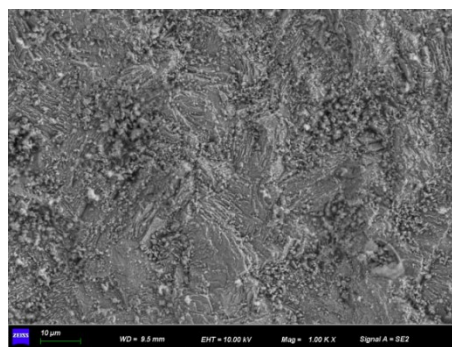

(b)

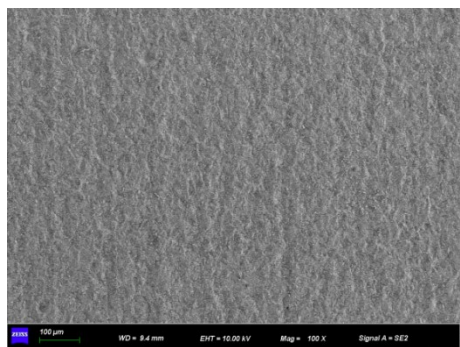

(c)

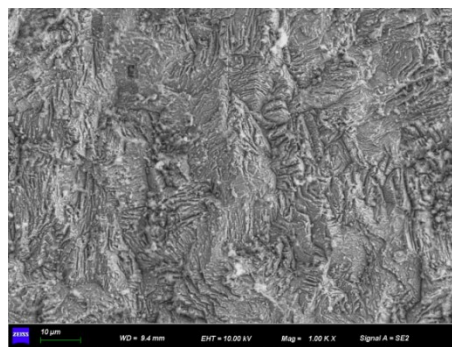

(d)

**Fig. S38** SEM images of 20# steel coupons in the presence of different concentrations of TPE- $2\text{NH}_3 \cdot 2\text{Br}$  after weight loss experiment: (a, b) 40 mg/L; (c, d) 70 mg/L. Scale: 100  $\mu\text{m}$  for (a, c) and 10  $\mu\text{m}$  for (b, d).

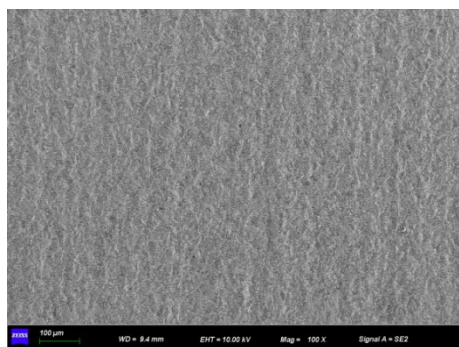

(a)

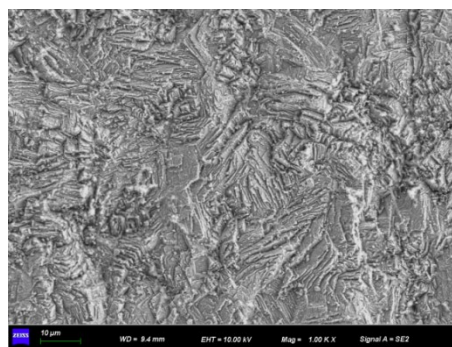

(b)

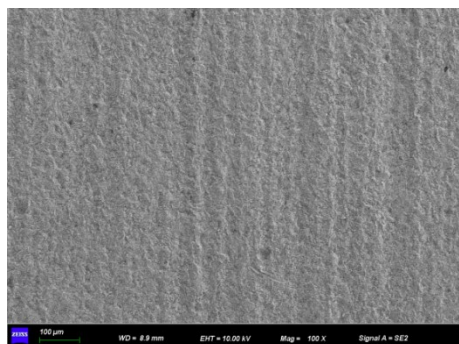

(c)

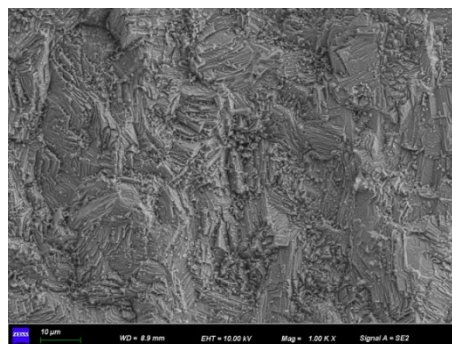

(d)

**Fig. S39** SEM images of 20# steel coupons in the presence of different concentrations of TPE- $2\text{NH}_3 \cdot 2\text{NO}_3$  after weight loss experiment: (a, b) 40 mg/L; (c, d) 70 mg/L. Scale: 100 μm for (a, c) and 10 μm for (b, d).

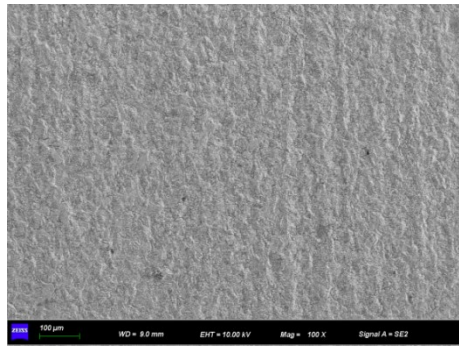

(a)

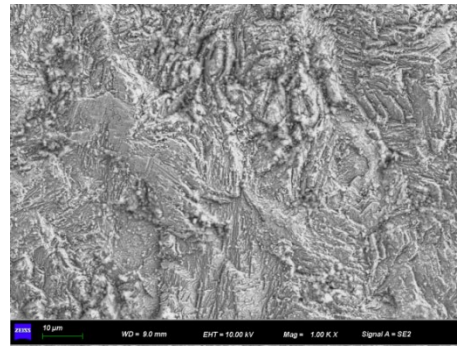

(b)

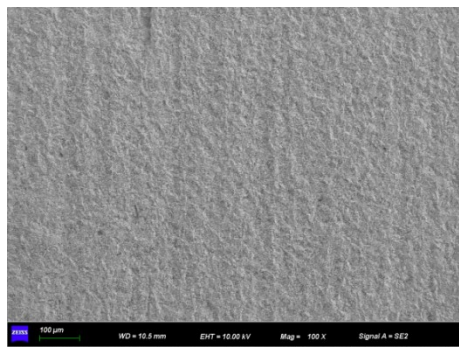

(c)

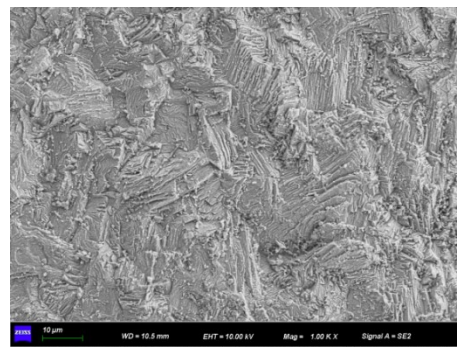

(d)

**Fig. S40** SEM images of 20# steel coupons in the presence of different concentration of TPE- $2\text{NH}_3 \cdot 2\text{NH}_2\text{SO}_3$  after weight loss experiment: (a, b) 40 mg/L; (c, d) 70 mg/L. Scale: 100  $\mu\text{m}$  for (a, c) and 10  $\mu\text{m}$  for (b, d).



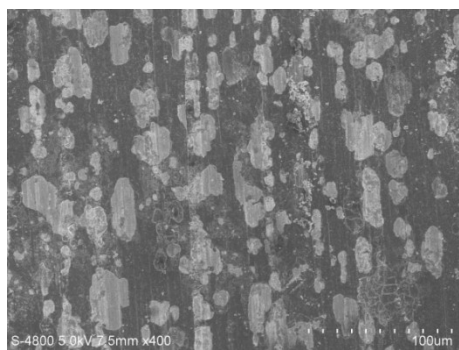

(a)

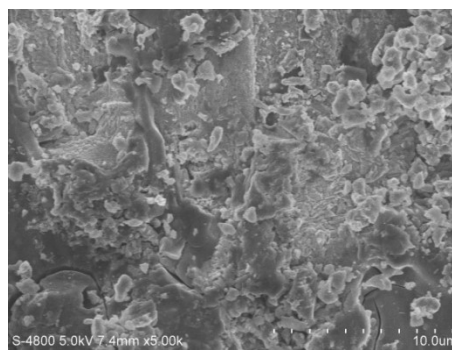

(b)

**Fig. S41** SEM images of H62 coupon in the presence of 70 mg/L TPE-2NH<sub>3</sub>·2SCN after weight loss experiment. Scale: (a) 100 µm; (b) 10 µm.

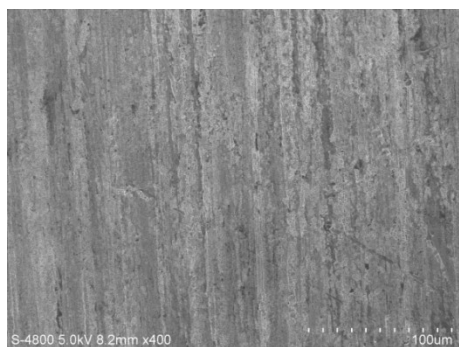

(a)

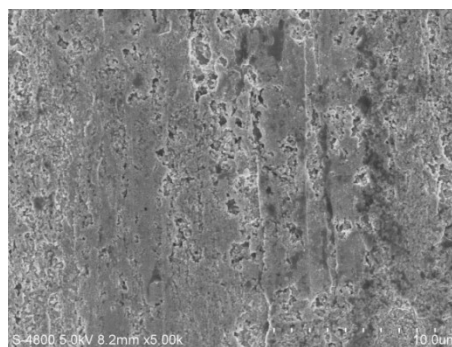

(b)

**Fig. S42** SEM images of H62 coupon in the presence of 70 mg/L TPE-2NH<sub>3</sub>·SO<sub>4</sub> after weight loss experiment. Scale: (a) 100 µm; (b) 10 µm.

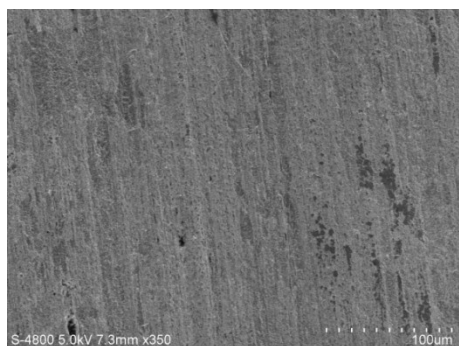

(a)

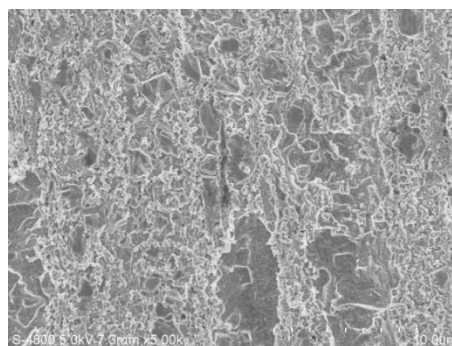

(b)

**Fig. S43** SEM images of H62 coupon in the presence of 70 mg/L TPE-2NH<sub>3</sub>·2Cl after weight loss experiment. Scale: (a) 100 µm; (b) 10 µm.

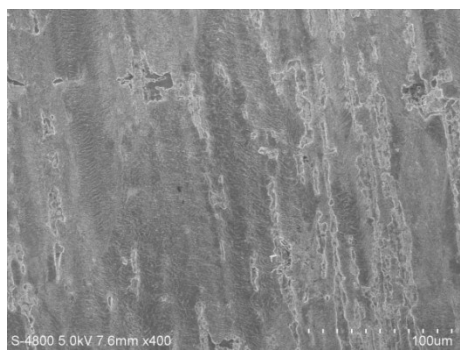

(a)

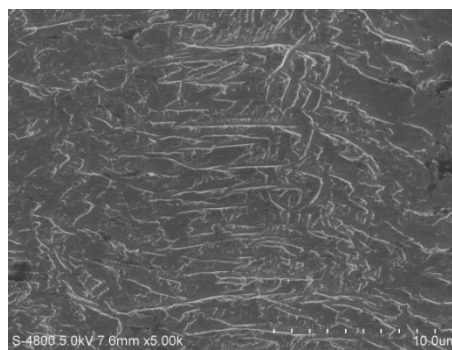

(b)

**Fig. S44** SEM images of H62 coupon in the presence of 70 mg/L TPE-2NH<sub>3</sub>·2Br after weight loss experiment. Scale: (a) 100 μm; (b) 10 μm.

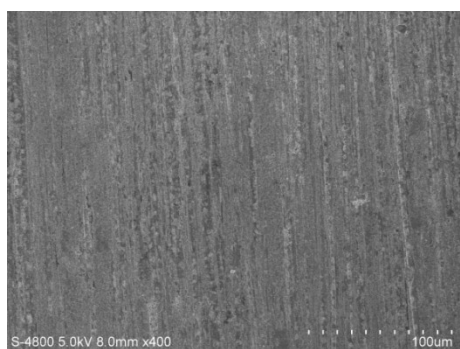

(a)

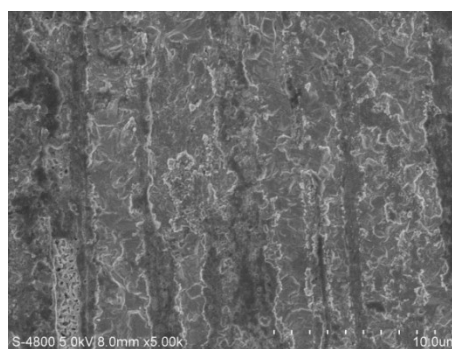

(b)

**Fig. S45** SEM images of H62 coupon in the presence of 70 mg/L TPE-2NH<sub>3</sub>·2NO<sub>3</sub> after weight loss experiment. Scale: (a) 100 μm; (b) 10 μm.

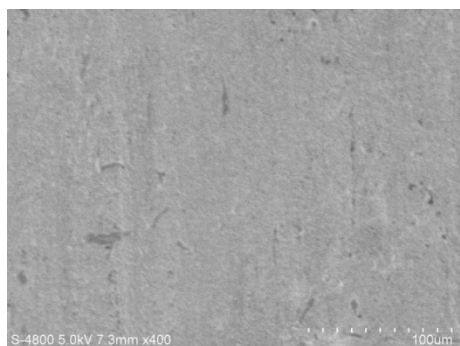

(a)

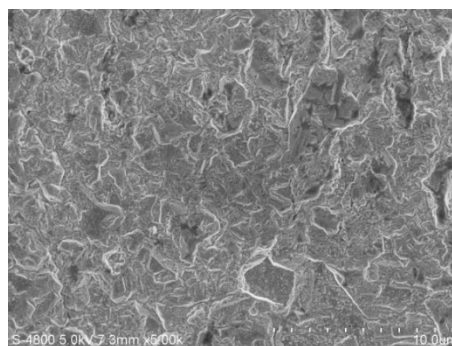

(b)

**Fig. S46** SEM images of H62 coupon in the presence of 70 mg/L TPE-2NH<sub>3</sub>·2NH<sub>2</sub>SO<sub>3</sub> after weight loss experiment. Scale: (a) 100 μm; (b) 10 μm.

## 6. XPS data

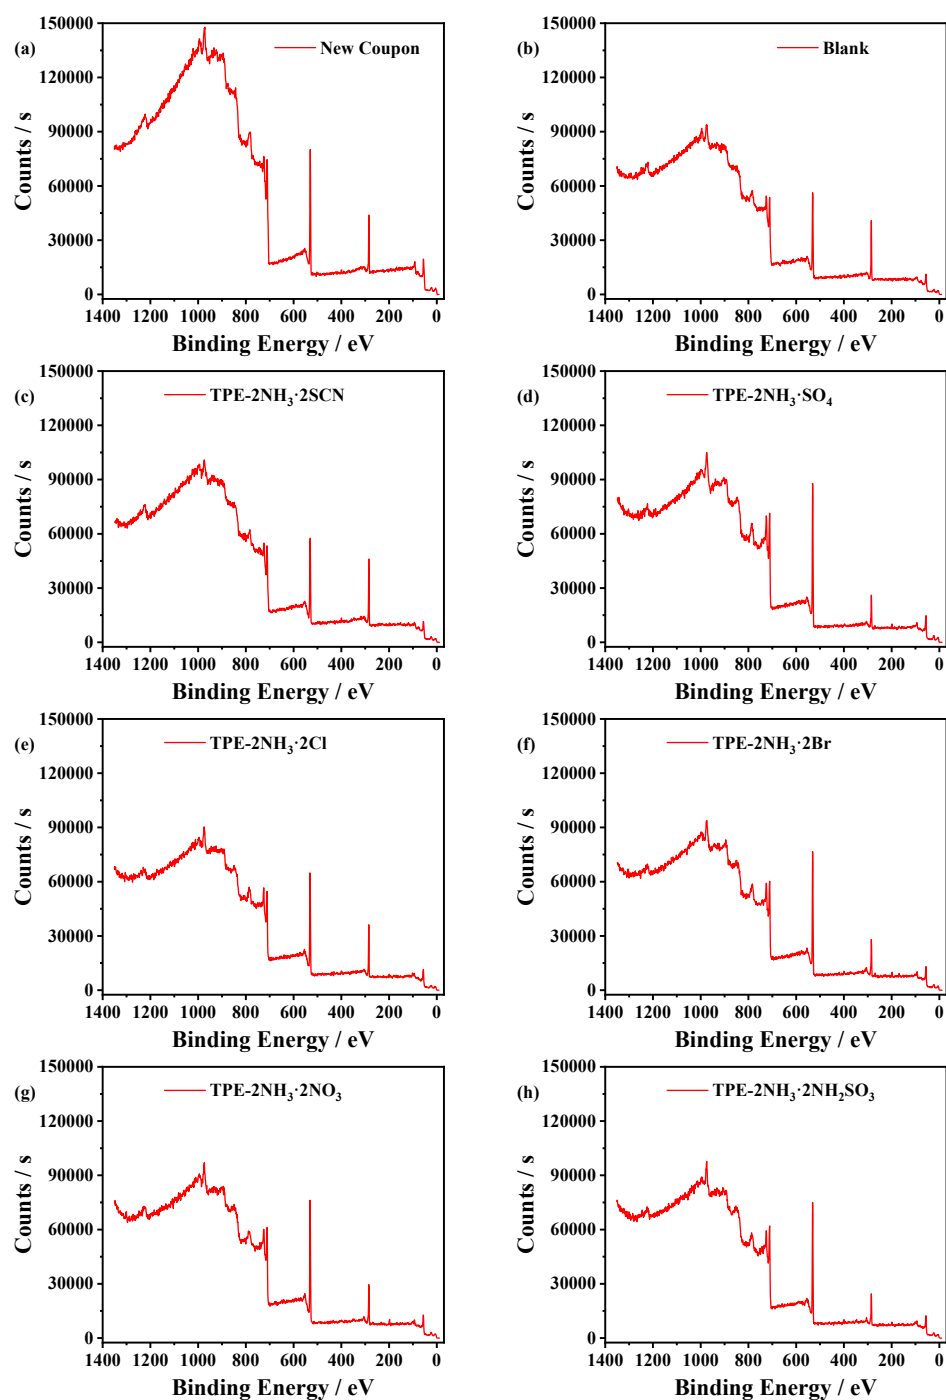

**Fig. S47** The XPS full spectra of 20# steel coupons: (a) new coupon before corrosion; (b) blank sample after weight loss experiment; in the presence of 100 mg/L (c) TPE-2NH<sub>3</sub>·2SCN, (d) TPE-2NH<sub>3</sub>·SO<sub>4</sub>, (e) TPE-2NH<sub>3</sub>·2Cl, (f) TPE-2NH<sub>3</sub>·2Br, (g) TPE-2NH<sub>3</sub>·2NO<sub>3</sub>, (h) TPE-2NH<sub>3</sub>·2NH<sub>2</sub>SO<sub>3</sub> after weight loss experiment.

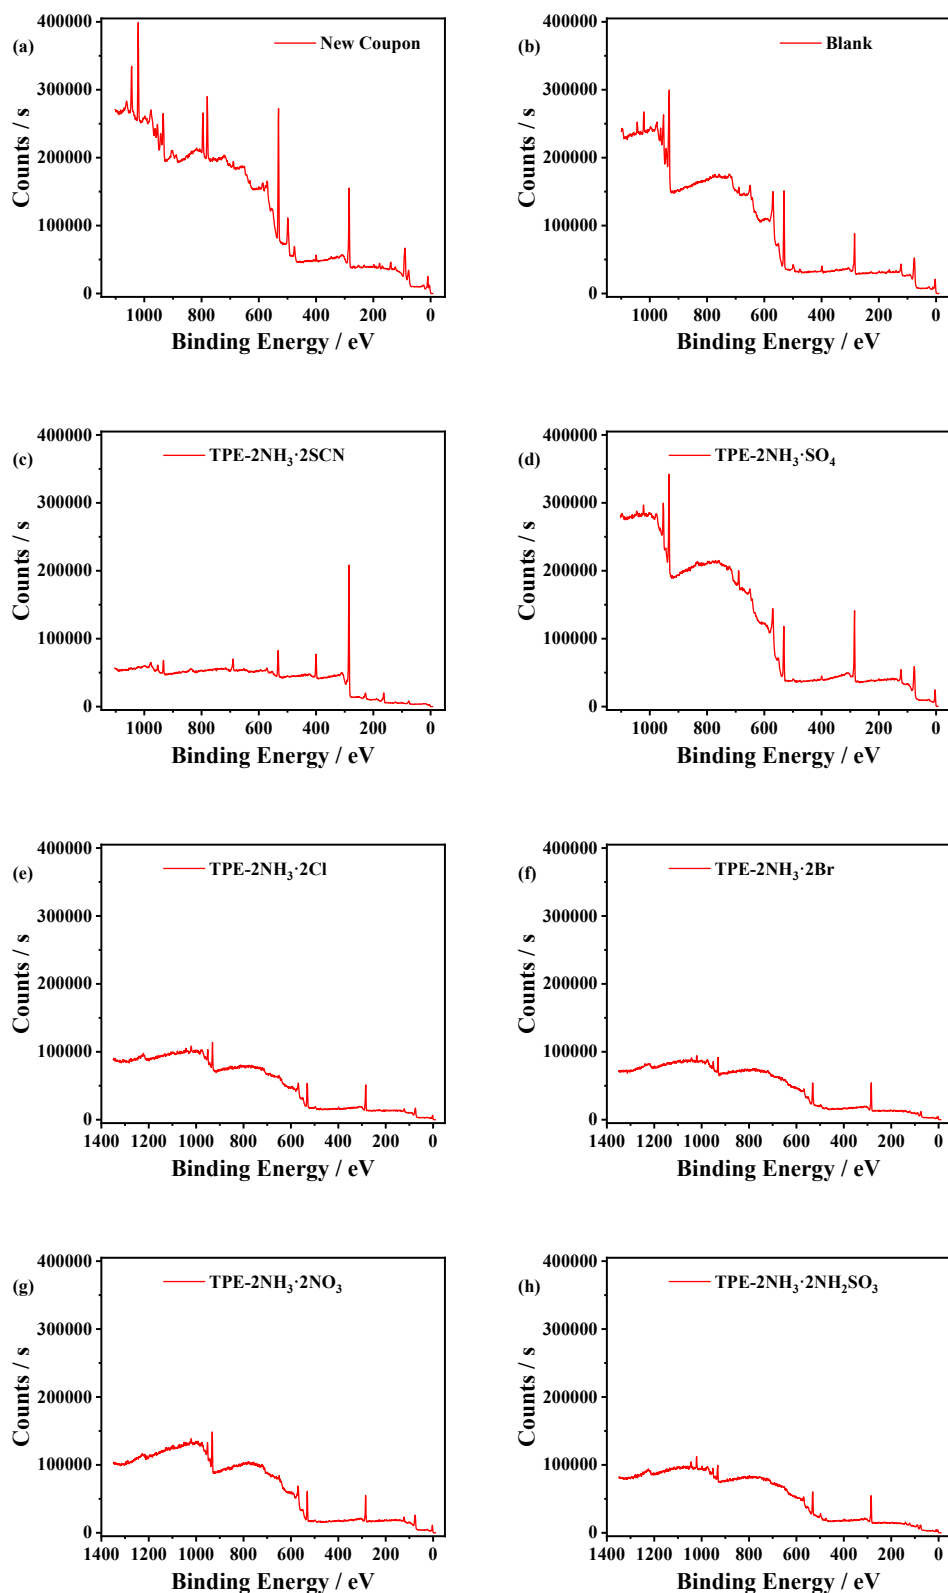

**Fig. S48** The XPS full spectra of H62 brass coupons: (a) new coupon before corrosion; (b) blank sample after weight loss experiment; in the presence of 100 mg/L (c) TPE-2NH<sub>3</sub>·2SCN, (d) TPE-2NH<sub>3</sub>·SO<sub>4</sub>, (e) TPE-2NH<sub>3</sub>·2Cl, (f) TPE-2NH<sub>3</sub>·2Br, (g) TPE-2NH<sub>3</sub>·2NO<sub>3</sub>, (h) TPE-2NH<sub>3</sub>·2NH<sub>2</sub>SO<sub>3</sub> after weight loss experiment.

## 7. Corrosion inhibitors in literature

**Table S5** List of corrosion inhibitors for carbon steel in literature.

| Inhibitor                                                                                                | Concentration      | Carbon steel      | Acid solution                         | Method      | Temperature      | Inhibition efficiency | Mechanism of action | $\Delta G_{ads}$ (kJ/mol) | Adsorption isotherm | Reference |
|----------------------------------------------------------------------------------------------------------|--------------------|-------------------|---------------------------------------|-------------|------------------|-----------------------|---------------------|---------------------------|---------------------|-----------|
| Dodecyl trimethyl ammonium bromide (DTAB)-Thiourea                                                       | 10 <sup>-3</sup> M | Q235              | 0.05 M H <sub>2</sub> SO <sub>4</sub> | Weight-loss | 30°C             | 93.37%                |                     |                           |                     | [S6]      |
| Dodecyl dimethyl benzyl ammonium bromide (DDBAB)-Thiourea                                                | 10 <sup>-3</sup> M | Q235              | 0.05 M H <sub>2</sub> SO <sub>4</sub> | Weight-loss | 30°C             | 94.98%                |                     |                           |                     | [S6]      |
| Trans-cinnamaldehyde                                                                                     | 1000 ppm           | IS2062 mild steel | 1 M HCl                               | Weight-loss | 27°C             | 91%                   | Mixed-type          | -23.53                    | Temkin              | [S7]      |
| OMID                                                                                                     | 0.1 mM             | Carbon steel      | 1 M HCl                               | Weight-loss | Room temperature | ~97%                  | Mixed-type          |                           |                     | [S8]      |
| 1-butyl-2,3-dimethylimidazolium iodide [DBIM] <sup>+</sup> I <sup>-</sup>                                | 100 ppm            | API 5L X52        | 1 M H <sub>2</sub> SO <sub>4</sub>    | PDP         |                  | 95%                   | Mixed-type          | -35.5                     | Langmuir            | [S9]      |
| 1-propyl-2,3-dimethylimidazolium iodide [DPIM] <sup>+</sup> I <sup>-</sup>                               | 100 ppm            | API 5L X52        | 1 M H <sub>2</sub> SO <sub>4</sub>    | PDP         |                  | 96%                   | Mixed-type          | -37.6                     | Langmuir            | [S9]      |
| amino acid zwitterion(Z-1)                                                                               | 300.8 μM           | Mild steel        | 1 M HCl                               | Weight-loss | 303 K            | 95.40%                | Mixed-type          | -37.64                    | Langmuir            | [S10]     |
| amino acid zwitterion(Z-2)                                                                               | 15.04 μM           | Mild steel        | 1 M HCl                               | Weight-loss | 303 K            | 96.22%                | Mixed-type          | -41.40                    | Langmuir            | [S10]     |
| castor oil-based corrosion inhibitor (COCI)                                                              | 140 μM             | Mild steel        | 1 M HCl                               | PDP         | 60°C             | 86%                   | Mixed-type          | -41.2                     | Langmuir            | [S11]     |
| Fluconazole                                                                                              | 200 ppm            | API 5L X52        | 1 M HCl                               | EIS         | 20°C             | 90.6%                 | Mixed-type          | -23.7                     | Langmuir            | [S12]     |
| 1,2,4-triazole                                                                                           | 200 ppm            | API 5L X52        | 1 M HCl                               | EIS         | 20°C             | 91.4%                 | Mixed-type          | -18.0                     | Langmuir            | [S12]     |
| 1-bromo-2,4-di-fluorobenzene                                                                             | 200 ppm            | API 5L X52        | 1 M HCl                               | EIS         | 20°C             | 82.4%                 | Mixed-type          | -20.8                     | Langmuir            | [S12]     |
| Afungil                                                                                                  | 200 ppm            | API 5L X52        | 1 M HCl                               | EIS         | 20°C             | 79.1%                 |                     |                           | Langmuir            | [S12]     |
| 1-benzyl-4-phenyl-1H-1,2,3-triazole                                                                      | 2.13 mM            | A36 mild steel    | 1 M HCl                               | Weight-loss | 328 K            | 94.2%                 | Mixed-type          | -35.7                     | Langmuir            | [S13]     |
| Ginkgo leaf extract                                                                                      | 200 mg/L           | X70 steel         | 1 M HCl                               | EIS         | 318 K            | 92.5%                 | Mixed-type          | -28.83                    | Langmuir            | [S14]     |
| (4-benzothiazole-2-yl-phenyl)-dimethylamine                                                              | 50 ppm             | Mild steel        | 1 M HCl                               | Weight-loss | 25°C             | 96.8%                 | Mixed-type          | -40.80                    | Langmuir            | [S15]     |
| (1-benzyl-1H-1,2,3-triazole-4-yl)methanol (BTM)                                                          | 1 mM               | Mild steel        | 1 M HCl                               | Weight-loss | 25°C             | 97.8%                 |                     |                           | Langmuir            | [S16]     |
| (1-(pyridin-4-ylmethyl)-1H-1,2,3-triazole-4-yl)methanol (PTM)                                            | 1 mM               | Mild steel        | 1 M HCl                               | Weight-loss | 25°C             | 99.0%                 |                     |                           | Langmuir            | [S16]     |
| Methionine                                                                                               | 10 mM              | Carbon steel      | 0.5 M H <sub>2</sub> SO <sub>4</sub>  | EIS         | 25°C             | 85.92%                |                     |                           |                     | [S17]     |
| 2-(4-nitrophenyl) benzimidazole (4NPBI)                                                                  | 1 mM               | Mild steel        | 1 M HCl                               | PDP         | 303 K            | 93.7%                 | Mixed-type          | -39.12                    | Langmuir            | [S18]     |
| 2-(4-aminophenyl) benzimidazole (4APBI)                                                                  | 1 mM               | Mild steel        | 1 M HCl                               | PDP         | 303 K            | 89.7%                 | Mixed-type          | -37.94                    | Langmuir            | [S18]     |
| 2-(2-nitrophenyl) benzimidazole (2NPBI)                                                                  | 1 mM               | Mild steel        | 1 M HCl                               | PDP         | 303 K            | 87.8%                 | Mixed-type          | -37.32                    | Langmuir            | [S18]     |
| 2-(2-aminophenyl) benzimidazole (2APBI)                                                                  | 1 mM               | Mild steel        | 1 M HCl                               | PDP         | 303 K            | 85.0%                 | Mixed-type          | -36.68                    | Langmuir            | [S18]     |
| 2-phenyl benzimidazole (PBI)                                                                             | 1 mM               | Mild steel        | 1 M HCl                               | PDP         | 303 K            | 81.3%                 | Mixed-type          | -35.95                    | Langmuir            | [S18]     |
| 2-(n-hexylamino)-4-(3'-N,N-dimethylamino-propyl)amino-6-(benzothiazol-2-yl)thio-1,3,5-s-triazine (BTC6T) | 1 mM               | Carbon steel      | 1 M HCl                               | Weight-loss | 40°C             | 92.3%                 | Mixed-type          | -36.52                    | Langmuir            | [S19]     |
| 2-(n-octylamino)-4-(3'-N,N-dimethylamino-propyl)amino-6-(benzothiazol-2-yl)thio-1,3,5-s-triazine (BTC8T) | 1 mM               | Carbon steel      | 1 M HCl                               | Weight-loss | 40°C             | 92.9%                 | Mixed-type          | -37.92                    | Langmuir            | [S19]     |
| 2-((Thiazole-2-ylimino)methyl)phenol (THYMP)                                                             | 10 mM              | Mild steel        | 2 M HCl                               | Weight-loss | 303 K            | 94%                   | Mixed-type          | -34.3                     | Langmuir            | [S20]     |
| tetra-n-butylammonium L-methioninate [TBA][L-Met]                                                        | 1.59 mM            | Mild steel        | 1 M HCl                               | PDP         | °C               | 95.1%                 | Mixed-type          | -9.9                      | Frundlich           | [S21]     |
| 2-amino-5-(3-pyridyl)-1,3,4-thiadiazole(3-APTD)                                                          | 6 mM               | Mild steel        | 0.5 M H <sub>2</sub> SO <sub>4</sub>  | EIS         | 30°C             | 92%                   |                     | -33.36                    | Langmuir            | [S22]     |
| 2-amino-5-(4-pyridyl)-1,3,4-thiadiazole (4-APTD)                                                         | 6 mM               | Mild steel        | 0.5 M H <sub>2</sub> SO <sub>4</sub>  | EIS         | 30°C             | 95%                   |                     | -33.34                    | Langmuir            | [S22]     |
| 5-((E)-4-phenylbuta-1,3-dienylideneamino)-1,3,4-thiadiazole-2-thiol (PDTT)                               | 1 mM               | Mild steel        | 0.5 M HCl                             | EIS         | 298 K            | 97.9%                 | Mixed-type          | -40.16                    | Langmuir            | [S23]     |
| 3,4-dihydroxy-L-phenylalanine (L-DOPA)                                                                   | 200 mg/L           | Mild steel        | 1 M HCl                               | PDP         | Room temperature | 97.95%                | Mixed-type          | -30.41                    | Langmuir            | [S24]     |
| excess sewage sludge (ESS)                                                                               | 0.372 g/L          |                   | 10% HCl                               | Weight-loss | °C               | 93.5%                 | Mixed-type          | -24.52                    | Langmuir            | [S25]     |
| Hexadecylpyridinium bromide (HDPB)                                                                       | 1 mM               | Mild steel        | 0.5 M H <sub>2</sub> SO <sub>4</sub>  | EIS         | 60°C             | 91%                   | Mixed-type          | -39.50                    | Bockris-S winkels   | [S26]     |
| Polyaspartic acid (PASP)                                                                                 | 2 g/L              | Mild steel        | 0.5 M H <sub>2</sub> SO <sub>4</sub>  | Weight-loss | 303 K            | 87.9%                 |                     |                           |                     | [S27]     |
| 2-[4-(2-chlorobenzyl)-3-methyl-6-thioxopyridazin-1(6H)-yl]acetohydrazide                                 | 25 mM              | Steel             | 0.5 M H <sub>2</sub> SO <sub>4</sub>  | Weight-loss | 298 K            | 99%                   |                     | -18.76                    | Temkin              | [S28]     |
| N,N-Diethylammonium O,O'-di(4-bromophenyl)dithiophosphate (Br-NOP)                                       | 100 mg/L           | Q235 steel        | 0.5 M H <sub>2</sub> SO <sub>4</sub>  | EIS         | 300 K            | 98.07%                |                     | -39.61                    | Langmuir            | [S29]     |
| Omeprazole (OMP)                                                                                         | 300 mg/L           | X60 Steel         | 0.5 M H <sub>2</sub> SO <sub>4</sub>  | EIS         | 298 K            | 92.52%                |                     | -26.06                    | Langmuir            | [S30]     |

**Table S6** List of corrosion inhibitors for brass in literature.

| Inhibitor                                                        | Concentration                | Test solution                                  | Method      | Temperature      | Inhibition efficiency | Mechanism of action | $\Delta G_{ads}$ (kJ/mol) | Adsorption isotherm | Reference |
|------------------------------------------------------------------|------------------------------|------------------------------------------------|-------------|------------------|-----------------------|---------------------|---------------------------|---------------------|-----------|
| Sodium gluconate (SG) and cetyltrimethyl ammonium bromide (CTAB) | $10^{-3}$ M of SG, 5ppm CTAB | 0.5 M H <sub>2</sub> SO <sub>4</sub>           | PDP         | 303K             | 89%                   | Cathodic-type       | -44.1                     | Langmuir            | [S31]     |
| Polyanethol sulfonate                                            | 0.1%                         | simulated urban rain (pH = 5)                  | PDP         | 25°C             | 90%                   | Mixed-type          |                           |                     | [S32]     |
| 4-aminothiophenol (4-ATP)                                        | 200ppm                       | 0.5 M HNO <sub>3</sub>                         | PDP         | 25°C             | 81%                   | Cathodic-type       | -32.77                    | Langmuir            | [S33]     |
| 4-amino phenol disulfide (4-APD)                                 | 200ppm                       | 0.5 M HNO <sub>3</sub>                         | PDP         | 25°C             | 93%                   | Cathodic-type       | -31.05                    | Langmuir            | [S33]     |
| natural extract of Camellia sinensis                             | 1 g/L                        | 0.1 M Na <sub>2</sub> SO <sub>4</sub> (pH = 4) | EIS         | Room temperature | 95%                   | Mixed-type          |                           |                     | [S34]     |
| Mimosa extract                                                   | 2000ppm                      | 0.5 M H <sub>2</sub> SO <sub>4</sub>           | PDP<br>EIS  | Room temperature | 63.5%<br>60.24%       | Anodic-type         | -6.0138                   | Temkin              | [S35]     |
| 1-diethylamino-propan-2-ol (EAP)                                 | 0.01 mol/L                   | simulated atmospheric water                    | EIS         |                  | 90.7%                 | Anodic-type         |                           |                     | [S36]     |
| 1,3-bis-diethylamino-propan-2-ol (DEAP)                          | 0.01 mol/L                   | simulated atmospheric water                    | EIS         |                  | 92.9%                 | Anodic-type         |                           |                     | [S36]     |
| 1,3-bis-diethylamino-propan-2-ol (DEAP)                          | 10 mM                        | simulated atmospheric water                    | Weight-loss | 50°C             | 94.3%                 | Anodic-type         |                           | Langmuir            | [S37]     |
| N-[1-(benzotriazol-1-yl)ethyl]aniline (BTEA)                     | 150 ppm                      | 3% NaCl solution                               | Weight-loss | Room temperature | ~88%                  | Mixed-type          |                           |                     | [S38]     |
| N,N-dibenzotriazol-1-ylmethylaminoethane (DBME)                  | 150 ppm                      | 3% NaCl solution                               | Weight-loss | Room temperature | ~92%                  | Mixed-type          |                           |                     | [S38]     |
| Benzotriazole(BTA)                                               | 150 ppm                      | 3% NaCl solution                               | Weight-loss | Room temperature | 74.80%                | Mixed-type          |                           |                     | [S39]     |
| N-[1-(benzotriazol-1-yl)methyl]aniline (BTMA)                    | 150 ppm                      | 3% NaCl solution                               | Weight-loss | Room temperature | 85.08%                | Mixed-type          |                           |                     | [S39]     |
| 1-hydroxy methyl benzotriazole (HBTA)                            | 150 ppm                      | 3% NaCl solution                               | Weight-loss | Room temperature | 91.13%                | Mixed-type          |                           |                     | [S39]     |
| Gluconic acid sodium (GASS)                                      | 0.01 M                       | 3% NaCl solution                               | EIS         |                  | ~95%                  |                     |                           |                     | [S40]     |
| Polyphosphoric acid sodium salt (PP)                             | 1 g/L                        | 3% NaCl solution                               | EIS         |                  | ~50%                  |                     |                           |                     | [S40]     |

## 8. Grand Canonical Monte Carlo (GCMC) Calculations

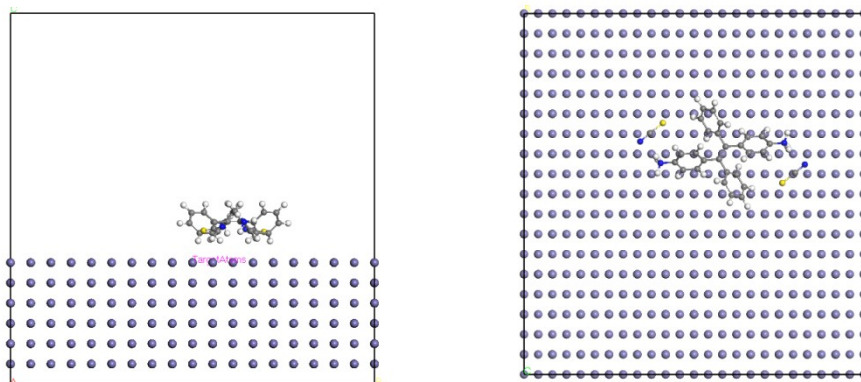

**Fig. S49** Side view (left) and top view (right) of equilibrium adsorption configuration for TPE-2NH<sub>3</sub>·2SCN on steel obtained by GCMC simulation in solution.

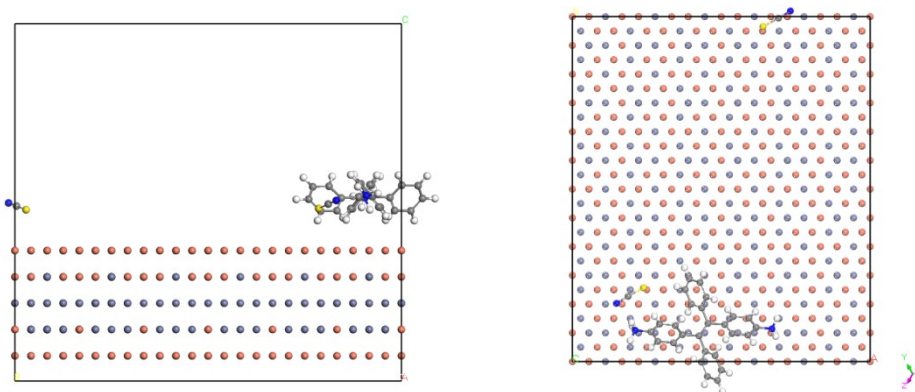

**Fig. S50** Side view (left) and top view (right) of equilibrium adsorption configuration for TPE-2NH<sub>3</sub>·2SCN on brass obtained by GCMC simulation in solution.

Reference:

- [S1] J. Xiong, W. Xie, J. Sun, J. Wang, Z. Zhu, H. Feng, D. Guo, H. Zhang and Y. Zheng, *J. Org. Chem.*, 2016, **81**, 3720-3726.
- [S2] A. Schreivogel, J. Maurer, R. Winter, A. Baro and S. Laschat, *Eur. J. Org. Chem.*, 2006, 3395-3404.
- [S3] J. Lu and J. Zhang, *J. Mater. Chem. A*, 2014, **2**, 13831-13834.
- [S4] T. Yu, D. Ou, Z. Yang, Q. Huang, Z. Mao, J. Chen, Y. Zhang, S. Liu, J. Xu, M.R. Bryce and Z. Chi, *Chem. Sci.*, 2017, **8**, 1163-1168.
- [S5] W. Zhao, Z. He, Q. Peng, J. W. Y. Lam, H. Ma, Z. Qiu, Y. Chen, Z. Zhao, Z. Shuai, Y. Dong and B. Z. Tang, *Nat. Commun.*, 2018, **9**, 3044-3051.
- [S6] T. Zheng, J. Liu, M. Wang, L. Qian, J. Wang, Y. Chong and G. Lia, *Corros. Sci.*, 2022, 199, 110199.
- [S7] K. Dharmendr, K. Venkata Muralidhar, J. Vinay and R. Beena, *Corros. Sci.*, 2022, **208**, 110623.
- [S8] K. Kousar, M. S. Walczak, T. Ljungdahl, A. Wetzel, H. Oskarsson, P. Restuccia, E. A. Ahmad, N. M. Harrison and R. Lindsay, *Corros. Sci.*, 2021, **180**, 109195.
- [S9] A. L. Paulina, D. J. Víctor, H. Hernández-Cocoletzi, N. Noel, O. X. Octavio and V. L. Natalya, *Corros. Sci.*, 2020, **175**, 108888.
- [S10] J. Haque, V. Srivastava, M. A. Quraishi, D. Singh Chauhan, H. Lgaz and I. Chung, *Corros. Sci.*, 2020, 172, 108665.
- [S11] A. Farhadian, A. Rahimi, N. Safaei, A. Shaabani, M. Abdouss and A. Alavi, *Corros. Sci.*, 2020, **175**, 108871.
- [S12] A. Espinoza-Vázquez, F. J. Rodríguez-Gómez, G. E. Negrón-Silva, R. González-Olvera, D. Ángeles-Beltrán, M. Palomar-Pardavé, A. Miralrio and M. Castro, *Corros. Sci.*, 2020, **174**, 108853.
- [S13] F. Caio Machado, X. A. Leonardo, S. Nazir Escarpini dos, C. M. B. Adriana and P. Eduardo Ariel, *Corros. Sci.*, 2019, **149**, 185-194.
- [S14] Y. Qiang, S. Zhang, B. Tan and S. Chen, *Corros. Sci.*, 2018, **133**, 6-16.
- [S15] S. Zohreh, A. Mehdi, T. Milad, R. Keyvan and M. Soraia, *Corros. Sci.*, 2017, **114**, 133-145.



- [S16] M. Qi, Q. Sijun, H. Xiaohong, T. Yongming and L. Gang, *Corros. Sci.*, 2017, **129**, 91-101.
- [S17] L. F. M. Glaydson, N. C. Stefane, N. F. Valder, N. S. C. Paulo, N. C. Adriana and L.-N. Pedro de, *Corros. Sci.*, 2017, **115**, 41-55.
- [S18] A. Dutta, S. K. Saha, U. Adhikari, P. Banerjee and D. Sukul, *Corros. Sci.*, 2017, **123**, 256-266.
- [S19] Z. Hu, Y. Meng, X. Ma, H. Zhu, J. Li, C. Li and D. Cao, *Corros. Sci.*, 2016, **112**, 563-575.
- [S20] Y. Nurdane, F. Alper, E. ymit and C.E. Kaan, *Corros. Sci.*, 2016, **111**, 110-120.
- [S21] E. Kowsari, S. Y. Arman, M. H. Shahini, H. Zandi, A. Ehsani, R. Naderi, A. PourghasemiHanza and M. Mehdipour, *Corros. Sci.*, 2016, **112**, 73-85.
- [S22] Y. Tang, X. Yang, W. Yang, R. Wan, Y. Chen and X. Yin, *Corros. Sci.*, 2010, **52.5**, 1801-1808.
- [S23] R. Solmaz, *Corros. Sci.*, 2010, **52.10**, 3321-3330.
- [S24] H. Zhao, T. Sun, L. Huang, J. Wei and S. Qiu, *Chem. Eng. J.*, 2022, **437**, 135242.
- [S25] W. Su, B. Tang, F. Fu, S. Huang, S. Zhao, L. Bin, J. Ding and C. Chen, *J. Hazard. Mater.*, 2014, **279**, 38-45.
- [S26] Mahmoud M. Saleh, *Mater. Chem. Phys.*, 2006, **98**, 0254-0584.
- [S27] B. Qian, J. Wang, M. Zheng and B. Hou, *Corros. Sci.*, 2013, **75**, 0010-938X.
- [S28] M. Bouklah, N. Benchat, A. Aouniti, B. Hammouti, M. Benkaddour, M. Lagrenée, H. Vezin and F. Bentiss, *Prog. Org. Coat.*, 2004, **51**, 0300-9440.
- [S29] C. Lai, X. Su, T. Jiang, L. Zhou, B. Xie, Y. Li and L. Zou, *Int. J. Electrochem. Sci.*, 2016, **11**, 9413-9423.
- [S30] Y. Liu, W. Du, X. Yao, C. Liu, X. Luo, L. Guo and C. Guo, *Int. J. Electrochem. Sci.*, 2022, **17**, 220516.
- [S31] J. Jennane, M. Ebn Touhami, S. Zehra, Y. Baymou, S. Kim, I. Chung, and H. Lgaz, *Mater. Chem. Phys.*, 2019, **227**, 200.
- [S32] R. Fuchs-Godec, *J. Mol. Liq.*, 2017, **228**, 230.
- [S33] M. Ebrahimzadeh, M. Gholami, M. Momeni, A. Kosari, M. H. Moayed and A. Davoodi, *Appl. Surf. Sci.*, 2015, **332**, 384.
- [S34] R. Tambi, R. Stefano and Z. Caterina, *Appl. Surf. Sci.*, 2014, **307**, 209.

- [S35] H. Gerengi, K. Schaefer and H. I. Sahin, *J. Ind. Eng. Chem.*, 2012, **18**, 2204.
- [S36] G. Guo and L. Chenghao, *Electrochim. Acta*, 2007, **52**, 4554.
- [S37] G. Gao and C. Liang, *Corros. Sci.*, 2007, **49**, 3479.
- [S38] R. Ravichandran and N. Rajendran, *Appl. Surf. Sci.*, 2005, **239**, 182.
- [S39] R. Ravichandran, S. Nanjundan and N. Rajendran, *Appl. Surf. Sci.*, 2004, **236**, 241.
- [S40] A. Nagiub and F. Mansfeld, *Corros. Sci.*, 2001, **43**, 2147.
